# Supplementary material for: Cellular transcriptional alterations of peripheral blood in Alzheimer’s disease
Source: BMC Med. 2022 Aug 29;20:266. doi: 10.1186/s12916-022-02472-4 (PMC9422129; doi:10.1186/s12916-022-02472-4)
Supplement: Supplementary file 2 — Additional file 2: Table S1. Comparison of proportion of neutrophils, B cells, and NLR between AD/MCI and NC with adjusting for age and sex. Table S2. Top enriched pathways for each PPI module cluster identified in neutrophils. Table S3. The complete list of enriched terms in AD compared with NC across different data cohorts. Table S4. The complete list of enriched terms in MCI compared with NC across different data cohorts. [file 12916_2022_2472_MOESM2_ESM.xlsx]

## Sheet: Table S1
Table S1. Comparison of proportion of neutrophils, B cells, and NLR between AD/MCI and NC with adjusting for age and sex.
	Neutrophil				B cell				NLR
	AD		MCI		AD		MCI		AD		MCI
	t	P-value	t	P-value	t	P-value	t	P-value	t	P-value	t	P-value
ADNI	2.11	0.035	1.45	0.15	-2.55	0.011	-1.25	0.21	1.825	0.069	1.15	0.25
ANM1	2.24	0.026	1.38	0.17	-2.18	0.03	-1.05	0.3	2.165	0.031	1.51	0.13
ANM2	2.51	0.013	2.91	0.004	-3.49	0.00056	-1.06	0.29	2.551	0.01	2.5	0.013
ZIB	0.73	0.46	0.58	0.57	0.35	0.73	-0.75	0.46	1.055	0.29	1.74	0.084

## Sheet: Table S2
Table S2. Top enriched pathways for each PPI module cluster identified in neutrophils
Module clusters	Annotation
Module cluster 1	GO:0006412|translation|-25.6;GO:0043043|peptide biosynthetic process|-25.0;GO:0022613|ribonucleoprotein complex biogenesis|-23.3
Module cluster 2	GO:0050863|regulation of T cell activation|-8.7;GO:1903037|regulation of leukocyte cell-cell adhesion|-8.7;GO:0051249|regulation of lymphocyte activation|-8.5;GO:0019221|cytokine-mediated signaling pathway|-7.5
Module cluster 3	GO:0007005|mitochondrion organization|-10.2;GO:0019221|cytokine-mediated signaling pathway|-6.2;GO:0071345|cellular response to cytokine stimulus|-5.7;GO:004603|ATP metabolic process|-4.0
Module cluster 4	GO:0007005|mitochondrion organization|-6.3;GO:0006839|mitochondrial transport|-6.1;GO:0006518|peptide metabolic process|-5.9;GO:0072594|establishment of protein localization to organelle|-5.4
Module cluster 5	GO:0031307|integral component of mitochondrial outer membrane|2.636E-4;GO:0048638|regulation of developmental growth|-2.9;GO:0001558|regulation of cell growth|-2.6;GO:0007005|mitochondrion organization|-2.6
Module cluster 6	GO:0006351|transcription, DNA-templated|-4.1;GO:0097659|nucleic acid-templated transcription|-4.0;GO:0032774|RNA biosynthetic process|-4.0
Module cluster 7	GO:0016567|protein ubiquitination|-2.7;GO:0080135|regulation of cellular response to stress|-2.6;GO:0032446|protein modification by small protein conjugation|-2.6
Module cluster 10	GO:0006887|exocytosis|-4.7;GO:0032940|secretion by cell|-4.0;GO:0140352|export from cell|-3.8

## Sheet: Table S3
Table S3. The complete list of enriched terms in AD compared with NC across different data cohorts.
GO	Description	PARENT_GO	LogP	Log(q-value)	GeneList
GO:0006518	peptide metabolic process	19_GO:0008152 metabolic process	-17	-14	ADNI
GO:0006412	translation	19_GO:0008152 metabolic process	-16	-13	ADNI
GO:0043043	peptide biosynthetic process	19_GO:0008152 metabolic process	-16	-13	ADNI
GO:0043604	amide biosynthetic process	19_GO:0008152 metabolic process	-15	-12	ADNI
GO:0043603	cellular amide metabolic process	19_GO:0008152 metabolic process	-14	-11	ADNI
GO:0034660	ncRNA metabolic process	19_GO:0008152 metabolic process	-11	-8.3	ADNI
GO:0034470	ncRNA processing	19_GO:0008152 metabolic process	-11	-7.8	ADNI
GO:0042254	ribosome biogenesis	19_GO:0009987 cellular process	-8.8	-6.2	ADNI
GO:0022613	ribonucleoprotein complex biogenesis	19_GO:0009987 cellular process	-8.5	-5.9	ADNI
GO:0002181	cytoplasmic translation	19_GO:0008152 metabolic process	-8.1	-5.6	ADNI
GO:0006364	rRNA processing	19_GO:0008152 metabolic process	-8.1	-5.6	ADNI
GO:0016072	rRNA metabolic process	19_GO:0008152 metabolic process	-7.8	-5.3	ADNI
GO:0007005	mitochondrion organization	19_GO:0009987 cellular process	-7.8	-5.3	ADNI
GO:0042273	ribosomal large subunit biogenesis	19_GO:0009987 cellular process	-6.4	-4	ADNI
GO:0140053	mitochondrial gene expression	19_GO:0008152 metabolic process	-5.9	-3.5	ADNI
GO:0032543	mitochondrial translation	19_GO:0008152 metabolic process	-5.7	-3.4	ADNI
GO:0034097	response to cytokine	19_GO:0050896 response to stimulus	-5.5	-3.2	ADNI
GO:0031163	metallo-sulfur cluster assembly	19_GO:0009987 cellular process	-5.4	-3.1	ADNI
GO:0016226	iron-sulfur cluster assembly	19_GO:0008152 metabolic process	-5.4	-3.1	ADNI
GO:0071345	cellular response to cytokine stimulus	19_GO:0050896 response to stimulus	-5.4	-3.1	ADNI
GO:0000470	maturation of LSU-rRNA	19_GO:0008152 metabolic process	-5.2	-3	ADNI
GO:0009060	aerobic respiration	19_GO:0008152 metabolic process	-5	-2.8	ADNI
GO:0045333	cellular respiration	19_GO:0008152 metabolic process	-4.9	-2.7	ADNI
GO:0097190	apoptotic signaling pathway	19_GO:0023052 signaling	-4.8	-2.6	ADNI
GO:0018130	heterocycle biosynthetic process	19_GO:0008152 metabolic process	-4.8	-2.6	ADNI
GO:0051262	protein tetramerization	19_GO:0009987 cellular process	-4.7	-2.6	ADNI
GO:0033617	mitochondrial cytochrome c oxidase assembly	19_GO:0009987 cellular process	-4.5	-2.4	ADNI
GO:0046034	ATP metabolic process	19_GO:0008152 metabolic process	-4.5	-2.4	ADNI
GO:0033108	mitochondrial respiratory chain complex assembly	19_GO:0009987 cellular process	-4.5	-2.4	ADNI
GO:0070129	regulation of mitochondrial translation	19_GO:0008152 metabolic process	-4.4	-2.3	ADNI
GO:0034654	nucleobase-containing compound biosynthetic process	19_GO:0008152 metabolic process	-4.3	-2.3	ADNI
GO:0019438	aromatic compound biosynthetic process	19_GO:0008152 metabolic process	-4.3	-2.2	ADNI
GO:0008535	respiratory chain complex IV assembly	19_GO:0009987 cellular process	-4.2	-2.1	ADNI
GO:0015980	energy derivation by oxidation of organic compounds	19_GO:0008152 metabolic process	-4.1	-2.1	ADNI
GO:0000183	rDNA heterochromatin assembly	19_GO:0048519 negative regulation of biological process	-4	-2	ADNI
GO:0006413	translational initiation	19_GO:0008152 metabolic process	-4	-2	ADNI
GO:0070131	positive regulation of mitochondrial translation	19_GO:0048518 positive regulation of biological process	-4	-2	ADNI
GO:0062125	regulation of mitochondrial gene expression	19_GO:0008152 metabolic process	-4	-2	ADNI
GO:0051493	regulation of cytoskeleton organization	19_GO:0050789 regulation of biological process	-4	-2	ADNI
GO:0006119	oxidative phosphorylation	19_GO:0008152 metabolic process	-4	-2	ADNI
GO:1990700	nucleolar chromatin organization	19_GO:0009987 cellular process	-3.8	-1.9	ADNI
GO:0006399	tRNA metabolic process	19_GO:0008152 metabolic process	-3.6	-1.7	ADNI
GO:0043065	positive regulation of apoptotic process	19_GO:0048518 positive regulation of biological process	-3.5	-1.6	ADNI
GO:0017004	cytochrome complex assembly	19_GO:0009987 cellular process	-3.5	-1.6	ADNI
GO:1902600	proton transmembrane transport	19_GO:0051179 localization	-3.4	-1.6	ADNI
GO:0002831	regulation of response to biotic stimulus	19_GO:0050896 response to stimulus	-3.4	-1.6	ADNI
GO:0000462	maturation of SSU-rRNA from tricistronic rRNA transcript (SSU-rRNA, 5.8S rRNA, LSU-rRNA)	19_GO:0008152 metabolic process	-3.4	-1.6	ADNI
GO:0006091	generation of precursor metabolites and energy	19_GO:0008152 metabolic process	-3.4	-1.6	ADNI
GO:1902806	regulation of cell cycle G1/S phase transition	19_GO:0050789 regulation of biological process	-3.4	-1.5	ADNI
GO:0022900	electron transport chain	19_GO:0008152 metabolic process	-3.4	-1.5	ADNI
GO:0006417	regulation of translation	19_GO:0008152 metabolic process	-3.4	-1.5	ADNI
GO:0043068	positive regulation of programmed cell death	19_GO:0048518 positive regulation of biological process	-3.4	-1.5	ADNI
GO:0010952	positive regulation of peptidase activity	19_GO:0048518 positive regulation of biological process	-3.3	-1.5	ADNI
GO:0015986	ATP synthesis coupled proton transport	19_GO:0051179 localization	-3.3	-1.4	ADNI
GO:0032693	negative regulation of interleukin-10 production	19_GO:0048519 negative regulation of biological process	-3.3	-1.4	ADNI
GO:0015985	energy coupled proton transport, down electrochemical gradient	19_GO:0051179 localization	-3.3	-1.4	ADNI
GO:0009451	RNA modification	19_GO:0008152 metabolic process	-3.2	-1.4	ADNI
GO:0045862	positive regulation of proteolysis	19_GO:0048518 positive regulation of biological process	-3.2	-1.4	ADNI
GO:0042255	ribosome assembly	19_GO:0009987 cellular process	-3.2	-1.4	ADNI
GO:0032042	mitochondrial DNA metabolic process	19_GO:0008152 metabolic process	-3.1	-1.3	ADNI
GO:0032329	serine transport	19_GO:0051179 localization	-3.1	-1.3	ADNI
GO:0010942	positive regulation of cell death	19_GO:0048518 positive regulation of biological process	-3.1	-1.3	ADNI
GO:0034248	regulation of cellular amide metabolic process	19_GO:0008152 metabolic process	-3.1	-1.3	ADNI
GO:2001056	positive regulation of cysteine-type endopeptidase activity	19_GO:0048518 positive regulation of biological process	-3.1	-1.3	ADNI
GO:0010950	positive regulation of endopeptidase activity	19_GO:0048518 positive regulation of biological process	-3.1	-1.3	ADNI
GO:0050856	regulation of T cell receptor signaling pathway	19_GO:0002376 immune system process	-3.1	-1.3	ADNI
GO:0050854	regulation of antigen receptor-mediated signaling pathway	19_GO:0002376 immune system process	-3.1	-1.3	ADNI
GO:0046037	GMP metabolic process	19_GO:0008152 metabolic process	-3	-1.3	ADNI
GO:0051259	protein complex oligomerization	19_GO:0009987 cellular process	-3	-1.3	ADNI
GO:1901142	insulin metabolic process	19_GO:0008152 metabolic process	-3	-1.2	ADNI
GO:0006886	intracellular protein transport	19_GO:0051179 localization	-3	-1.2	ADNI
GO:0000469	cleavage involved in rRNA processing	19_GO:0008152 metabolic process	-3	-1.2	ADNI
GO:0002683	negative regulation of immune system process	19_GO:0002376 immune system process	-3	-1.2	ADNI
GO:0071826	ribonucleoprotein complex subunit organization	19_GO:0009987 cellular process	-3	-1.2	ADNI
GO:0019221	cytokine-mediated signaling pathway	19_GO:0023052 signaling	-3	-1.2	ADNI
GO:0009145	purine nucleoside triphosphate biosynthetic process	19_GO:0008152 metabolic process	-2.9	-1.2	ADNI
GO:0046185	aldehyde catabolic process	19_GO:0008152 metabolic process	-2.9	-1.2	ADNI
GO:0007000	nucleolus organization	19_GO:0009987 cellular process	-2.9	-1.2	ADNI
GO:0034599	cellular response to oxidative stress	19_GO:0050896 response to stimulus	-2.9	-1.2	ADNI
GO:0042274	ribosomal small subunit biogenesis	19_GO:0009987 cellular process	-2.8	-1.1	ADNI
GO:0030490	maturation of SSU-rRNA	19_GO:0008152 metabolic process	-2.8	-1.1	ADNI
GO:0006839	mitochondrial transport	19_GO:0051179 localization	-2.8	-1.1	ADNI
GO:1990542	mitochondrial transmembrane transport	19_GO:0051179 localization	-2.8	-1.1	ADNI
GO:0055086	nucleobase-containing small molecule metabolic process	19_GO:0008152 metabolic process	-2.8	-1.1	ADNI
GO:0062197	cellular response to chemical stress	19_GO:0050896 response to stimulus	-2.8	-1.1	ADNI
GO:2000045	regulation of G1/S transition of mitotic cell cycle	19_GO:0050789 regulation of biological process	-2.8	-1.1	ADNI
GO:0006790	sulfur compound metabolic process	19_GO:0008152 metabolic process	-2.8	-1.1	ADNI
GO:0051250	negative regulation of lymphocyte activation	19_GO:0002376 immune system process	-2.8	-1.1	ADNI
GO:0031347	regulation of defense response	19_GO:0050896 response to stimulus	-2.7	-1.1	ADNI
GO:0046007	negative regulation of activated T cell proliferation	19_GO:0022610 biological adhesion	-2.7	-1.1	ADNI
GO:0051290	protein heterotetramerization	19_GO:0009987 cellular process	-2.7	-1.1	ADNI
GO:0000463	maturation of LSU-rRNA from tricistronic rRNA transcript (SSU-rRNA, 5.8S rRNA, LSU-rRNA)	19_GO:0008152 metabolic process	-2.7	-1.1	ADNI
GO:0051090	regulation of DNA-binding transcription factor activity	19_GO:0008152 metabolic process	-2.7	-1	ADNI
GO:0035456	response to interferon-beta	19_GO:0050896 response to stimulus	-2.7	-1	ADNI
GO:1901137	carbohydrate derivative biosynthetic process	19_GO:0008152 metabolic process	-2.7	-1	ADNI
GO:0002237	response to molecule of bacterial origin	19_GO:0044419 biological process involved in interspecies interaction between organisms	-2.7	-1	ADNI
GO:0030162	regulation of proteolysis	19_GO:0008152 metabolic process	-2.7	-1	ADNI
GO:0052547	regulation of peptidase activity	19_GO:0008152 metabolic process	-2.7	-1	ADNI
GO:0033365	protein localization to organelle	19_GO:0051179 localization	-2.6	-1	ADNI
GO:0050863	regulation of T cell activation	19_GO:0002376 immune system process	-2.6	-1	ADNI
GO:0042776	mitochondrial ATP synthesis coupled proton transport	19_GO:0051179 localization	-2.6	-1	ADNI
GO:0051341	regulation of oxidoreductase activity	19_GO:0065007 biological regulation	-2.6	-0.99	ADNI
GO:0051205	protein insertion into membrane	19_GO:0051179 localization	-2.6	-0.99	ADNI
GO:1903037	regulation of leukocyte cell-cell adhesion	19_GO:0022610 biological adhesion	-2.6	-0.98	ADNI
GO:1904893	negative regulation of receptor signaling pathway via STAT	19_GO:0023052 signaling	-2.6	-0.97	ADNI
GO:0043162	ubiquitin-dependent protein catabolic process via the multivesicular body sorting pathway	19_GO:0008152 metabolic process	-2.6	-0.97	ADNI
GO:1902532	negative regulation of intracellular signal transduction	19_GO:0023052 signaling	-2.6	-0.97	ADNI
GO:0009226	nucleotide-sugar biosynthetic process	19_GO:0008152 metabolic process	-2.6	-0.94	ADNI
GO:0043632	modification-dependent macromolecule catabolic process	19_GO:0008152 metabolic process	-2.6	-0.94	ADNI
GO:0051289	protein homotetramerization	19_GO:0009987 cellular process	-2.6	-0.94	ADNI
GO:0000460	maturation of 5.8S rRNA	19_GO:0008152 metabolic process	-2.6	-0.94	ADNI
GO:0006754	ATP biosynthetic process	19_GO:0008152 metabolic process	-2.6	-0.94	ADNI
GO:0022618	ribonucleoprotein complex assembly	19_GO:0009987 cellular process	-2.5	-0.93	ADNI
GO:0032981	mitochondrial respiratory chain complex I assembly	19_GO:0009987 cellular process	-2.5	-0.92	ADNI
GO:0010257	NADH dehydrogenase complex assembly	19_GO:0009987 cellular process	-2.5	-0.92	ADNI
GO:0006081	cellular aldehyde metabolic process	19_GO:0008152 metabolic process	-2.5	-0.92	ADNI
GO:0032970	regulation of actin filament-based process	19_GO:0050789 regulation of biological process	-2.5	-0.91	ADNI
GO:0044282	small molecule catabolic process	19_GO:0008152 metabolic process	-2.5	-0.91	ADNI
GO:0002832	negative regulation of response to biotic stimulus	19_GO:0048519 negative regulation of biological process	-2.5	-0.9	ADNI
GO:0009152	purine ribonucleotide biosynthetic process	19_GO:0008152 metabolic process	-2.5	-0.9	ADNI
GO:0002693	positive regulation of cellular extravasation	19_GO:0040011 locomotion	-2.5	-0.9	ADNI
GO:0043173	nucleotide salvage	19_GO:0008152 metabolic process	-2.5	-0.9	ADNI
GO:0032496	response to lipopolysaccharide	19_GO:0044419 biological process involved in interspecies interaction between organisms	-2.5	-0.9	ADNI
GO:0072594	establishment of protein localization to organelle	19_GO:0051179 localization	-2.5	-0.89	ADNI
GO:0072331	signal transduction by p53 class mediator	19_GO:0023052 signaling	-2.5	-0.88	ADNI
GO:0030865	cortical cytoskeleton organization	19_GO:0009987 cellular process	-2.5	-0.88	ADNI
GO:0007346	regulation of mitotic cell cycle	19_GO:0050789 regulation of biological process	-2.5	-0.88	ADNI
GO:1901990	regulation of mitotic cell cycle phase transition	19_GO:0050789 regulation of biological process	-2.5	-0.88	ADNI
GO:0010564	regulation of cell cycle process	19_GO:0050789 regulation of biological process	-2.4	-0.87	ADNI
GO:0009165	nucleotide biosynthetic process	19_GO:0008152 metabolic process	-2.4	-0.87	ADNI
GO:0050994	regulation of lipid catabolic process	19_GO:0008152 metabolic process	-2.4	-0.87	ADNI
GO:0032233	positive regulation of actin filament bundle assembly	19_GO:0048518 positive regulation of biological process	-2.4	-0.87	ADNI
GO:0045936	negative regulation of phosphate metabolic process	19_GO:0048519 negative regulation of biological process	-2.4	-0.87	ADNI
GO:1901361	organic cyclic compound catabolic process	19_GO:0008152 metabolic process	-2.4	-0.87	ADNI
GO:2001185	regulation of CD8-positive, alpha-beta T cell activation	19_GO:0002376 immune system process	-2.4	-0.87	ADNI
GO:0010563	negative regulation of phosphorus metabolic process	19_GO:0048519 negative regulation of biological process	-2.4	-0.87	ADNI
GO:0006575	cellular modified amino acid metabolic process	19_GO:0008152 metabolic process	-2.4	-0.86	ADNI
GO:1901293	nucleoside phosphate biosynthetic process	19_GO:0008152 metabolic process	-2.4	-0.86	ADNI
GO:0016485	protein processing	19_GO:0008152 metabolic process	-2.4	-0.86	ADNI
GO:0006979	response to oxidative stress	19_GO:0050896 response to stimulus	-2.4	-0.85	ADNI
GO:0030866	cortical actin cytoskeleton organization	19_GO:0009987 cellular process	-2.4	-0.84	ADNI
GO:0000288	nuclear-transcribed mRNA catabolic process, deadenylation-dependent decay	19_GO:0048519 negative regulation of biological process	-2.4	-0.84	ADNI
GO:0097191	extrinsic apoptotic signaling pathway	19_GO:0023052 signaling	-2.4	-0.83	ADNI
GO:0090407	organophosphate biosynthetic process	19_GO:0008152 metabolic process	-2.4	-0.83	ADNI
GO:0080111	DNA demethylation	19_GO:0008152 metabolic process	-2.4	-0.82	ADNI
GO:0000002	mitochondrial genome maintenance	19_GO:0009987 cellular process	-2.4	-0.82	ADNI
GO:2000010	positive regulation of protein localization to cell surface	19_GO:0051179 localization	-2.4	-0.82	ADNI
GO:0090501	RNA phosphodiester bond hydrolysis	19_GO:0008152 metabolic process	-2.3	-0.82	ADNI
GO:0006164	purine nucleotide biosynthetic process	19_GO:0008152 metabolic process	-2.3	-0.82	ADNI
GO:0009142	nucleoside triphosphate biosynthetic process	19_GO:0008152 metabolic process	-2.3	-0.82	ADNI
GO:0019217	regulation of fatty acid metabolic process	19_GO:0008152 metabolic process	-2.3	-0.8	ADNI
GO:0072665	protein localization to vacuole	19_GO:0051179 localization	-2.3	-0.79	ADNI
GO:0050870	positive regulation of T cell activation	19_GO:0022610 biological adhesion	-2.3	-0.79	ADNI
GO:2000008	regulation of protein localization to cell surface	19_GO:0051179 localization	-2.3	-0.79	ADNI
GO:0031295	T cell costimulation	19_GO:0022610 biological adhesion	-2.3	-0.79	ADNI
GO:0009144	purine nucleoside triphosphate metabolic process	19_GO:0008152 metabolic process	-2.3	-0.78	ADNI
GO:0022407	regulation of cell-cell adhesion	19_GO:0022610 biological adhesion	-2.3	-0.78	ADNI
GO:0034341	response to interferon-gamma	19_GO:0044419 biological process involved in interspecies interaction between organisms	-2.3	-0.78	ADNI
GO:0006753	nucleoside phosphate metabolic process	19_GO:0008152 metabolic process	-2.3	-0.77	ADNI
GO:0009167	purine ribonucleoside monophosphate metabolic process	19_GO:0008152 metabolic process	-2.3	-0.77	ADNI
GO:0050868	negative regulation of T cell activation	19_GO:0022610 biological adhesion	-2.3	-0.77	ADNI
GO:0008033	tRNA processing	19_GO:0008152 metabolic process	-2.3	-0.77	ADNI
GO:0009260	ribonucleotide biosynthetic process	19_GO:0008152 metabolic process	-2.2	-0.76	ADNI
GO:0051091	positive regulation of DNA-binding transcription factor activity	19_GO:0008152 metabolic process	-2.2	-0.76	ADNI
GO:0070925	organelle assembly	19_GO:0009987 cellular process	-2.2	-0.75	ADNI
GO:0002695	negative regulation of leukocyte activation	19_GO:0002376 immune system process	-2.2	-0.75	ADNI
GO:0001701	in utero embryonic development	19_GO:0032502 developmental process	-2.2	-0.75	ADNI
GO:0005975	carbohydrate metabolic process	19_GO:0008152 metabolic process	-2.2	-0.75	ADNI
GO:0031294	lymphocyte costimulation	19_GO:0002376 immune system process	-2.2	-0.75	ADNI
GO:2000116	regulation of cysteine-type endopeptidase activity	19_GO:0008152 metabolic process	-2.2	-0.75	ADNI
GO:0051495	positive regulation of cytoskeleton organization	19_GO:0048518 positive regulation of biological process	-2.2	-0.74	ADNI
GO:0045088	regulation of innate immune response	19_GO:0044419 biological process involved in interspecies interaction between organisms	-2.2	-0.74	ADNI
GO:0072522	purine-containing compound biosynthetic process	19_GO:0008152 metabolic process	-2.2	-0.74	ADNI
GO:0031348	negative regulation of defense response	19_GO:0048519 negative regulation of biological process	-2.2	-0.74	ADNI
GO:0009126	purine nucleoside monophosphate metabolic process	19_GO:0008152 metabolic process	-2.2	-0.73	ADNI
GO:0000079	regulation of cyclin-dependent protein serine/threonine kinase activity	19_GO:0008152 metabolic process	-2.2	-0.73	ADNI
GO:0052548	regulation of endopeptidase activity	19_GO:0008152 metabolic process	-2.2	-0.73	ADNI
GO:0006351	transcription, DNA-templated	19_GO:0008152 metabolic process	-2.2	-0.73	ADNI
GO:0035510	DNA dealkylation	19_GO:0008152 metabolic process	-2.2	-0.73	ADNI
GO:0030212	hyaluronan metabolic process	19_GO:0008152 metabolic process	-2.2	-0.73	ADNI
GO:0070482	response to oxygen levels	19_GO:0050896 response to stimulus	-2.2	-0.72	ADNI
GO:0016311	dephosphorylation	19_GO:0008152 metabolic process	-2.2	-0.72	ADNI
GO:0097659	nucleic acid-templated transcription	19_GO:0008152 metabolic process	-2.2	-0.72	ADNI
GO:1902622	regulation of neutrophil migration	19_GO:0040011 locomotion	-2.2	-0.71	ADNI
GO:0022408	negative regulation of cell-cell adhesion	19_GO:0022610 biological adhesion	-2.1	-0.71	ADNI
GO:0031123	RNA 3'-end processing	19_GO:0008152 metabolic process	-2.1	-0.7	ADNI
GO:0046700	heterocycle catabolic process	19_GO:0008152 metabolic process	-2.1	-0.7	ADNI
GO:0034655	nucleobase-containing compound catabolic process	19_GO:0008152 metabolic process	-2.1	-0.7	ADNI
GO:0046390	ribose phosphate biosynthetic process	19_GO:0008152 metabolic process	-2.1	-0.7	ADNI
GO:0009266	response to temperature stimulus	19_GO:0050896 response to stimulus	-2.1	-0.7	ADNI
GO:0032956	regulation of actin cytoskeleton organization	19_GO:0050789 regulation of biological process	-2.1	-0.7	ADNI
GO:0010565	regulation of cellular ketone metabolic process	19_GO:0008152 metabolic process	-2.1	-0.7	ADNI
GO:0001666	response to hypoxia	19_GO:0050896 response to stimulus	-2.1	-0.7	ADNI
GO:0036473	cell death in response to oxidative stress	19_GO:0050896 response to stimulus	-2.1	-0.7	ADNI
GO:0000466	maturation of 5.8S rRNA from tricistronic rRNA transcript (SSU-rRNA, 5.8S rRNA, LSU-rRNA)	19_GO:0008152 metabolic process	-2.1	-0.7	ADNI
GO:1904029	regulation of cyclin-dependent protein kinase activity	19_GO:0008152 metabolic process	-2.1	-0.7	ADNI
GO:0015804	neutral amino acid transport	19_GO:0051179 localization	-2.1	-0.7	ADNI
GO:0009206	purine ribonucleoside triphosphate biosynthetic process	19_GO:0008152 metabolic process	-2.1	-0.7	ADNI
GO:0031400	negative regulation of protein modification process	19_GO:0048519 negative regulation of biological process	-2.1	-0.68	ADNI
GO:0030163	protein catabolic process	19_GO:0008152 metabolic process	-2.1	-0.68	ADNI
GO:0016071	mRNA metabolic process	19_GO:0008152 metabolic process	-2.1	-0.67	ADNI
GO:0016073	snRNA metabolic process	19_GO:0008152 metabolic process	-2.1	-0.67	ADNI
GO:0044270	cellular nitrogen compound catabolic process	19_GO:0008152 metabolic process	-2.1	-0.67	ADNI
GO:0090151	establishment of protein localization to mitochondrial membrane	19_GO:0051179 localization	-2.1	-0.67	ADNI
GO:0046835	carbohydrate phosphorylation	19_GO:0008152 metabolic process	-2.1	-0.67	ADNI
GO:0050860	negative regulation of T cell receptor signaling pathway	19_GO:0002376 immune system process	-2.1	-0.67	ADNI
GO:0050688	regulation of defense response to virus	19_GO:0044419 biological process involved in interspecies interaction between organisms	-2.1	-0.67	ADNI
GO:0006997	nucleus organization	19_GO:0009987 cellular process	-2.1	-0.66	ADNI
GO:0032774	RNA biosynthetic process	19_GO:0008152 metabolic process	-2.1	-0.66	ADNI
GO:0000302	response to reactive oxygen species	19_GO:0050896 response to stimulus	-2	-0.65	ADNI
GO:0022904	respiratory electron transport chain	19_GO:0008152 metabolic process	-2	-0.65	ADNI
GO:0006470	protein dephosphorylation	19_GO:0008152 metabolic process	-2	-0.64	ADNI
GO:1903039	positive regulation of leukocyte cell-cell adhesion	19_GO:0022610 biological adhesion	-2	-0.64	ADNI
GO:0032682	negative regulation of chemokine production	19_GO:0048519 negative regulation of biological process	-2	-0.64	ADNI
GO:1903859	regulation of dendrite extension	19_GO:0040007 growth	-2	-0.64	ADNI
GO:0050857	positive regulation of antigen receptor-mediated signaling pathway	19_GO:0002376 immune system process	-2	-0.64	ADNI
GO:0042304	regulation of fatty acid biosynthetic process	19_GO:0008152 metabolic process	-2	-0.64	ADNI
GO:1990849	vacuolar localization	19_GO:0051179 localization	-2	-0.64	ADNI
GO:0032418	lysosome localization	19_GO:0051179 localization	-2	-0.64	ADNI
GO:1902414	protein localization to cell junction	19_GO:0051179 localization	-2	-0.62	ADNI
GO:0051249	regulation of lymphocyte activation	19_GO:0002376 immune system process	-2	-0.62	ADNI
GO:0006412	translation	19_GO:0008152 metabolic process	-23	-19	ANM1
GO:0006518	peptide metabolic process	19_GO:0008152 metabolic process	-22	-18	ANM1
GO:0043043	peptide biosynthetic process	19_GO:0008152 metabolic process	-21	-18	ANM1
GO:0022613	ribonucleoprotein complex biogenesis	19_GO:0009987 cellular process	-20	-16	ANM1
GO:0043604	amide biosynthetic process	19_GO:0008152 metabolic process	-19	-16	ANM1
GO:0043603	cellular amide metabolic process	19_GO:0008152 metabolic process	-19	-15	ANM1
GO:0042254	ribosome biogenesis	19_GO:0009987 cellular process	-17	-14	ANM1
GO:0006119	oxidative phosphorylation	19_GO:0008152 metabolic process	-17	-14	ANM1
GO:0009060	aerobic respiration	19_GO:0008152 metabolic process	-17	-13	ANM1
GO:0045333	cellular respiration	19_GO:0008152 metabolic process	-16	-13	ANM1
GO:0015980	energy derivation by oxidation of organic compounds	19_GO:0008152 metabolic process	-15	-12	ANM1
GO:0034470	ncRNA processing	19_GO:0008152 metabolic process	-14	-11	ANM1
GO:0006091	generation of precursor metabolites and energy	19_GO:0008152 metabolic process	-13	-9.7	ANM1
GO:0034660	ncRNA metabolic process	19_GO:0008152 metabolic process	-13	-9.7	ANM1
GO:0046034	ATP metabolic process	19_GO:0008152 metabolic process	-12	-9	ANM1
GO:1990542	mitochondrial transmembrane transport	19_GO:0051179 localization	-12	-8.8	ANM1
GO:0006364	rRNA processing	19_GO:0008152 metabolic process	-12	-8.7	ANM1
GO:0007005	mitochondrion organization	19_GO:0009987 cellular process	-11	-8.2	ANM1
GO:0016072	rRNA metabolic process	19_GO:0008152 metabolic process	-11	-8.2	ANM1
GO:0019646	aerobic electron transport chain	19_GO:0008152 metabolic process	-10	-7.7	ANM1
GO:0022904	respiratory electron transport chain	19_GO:0008152 metabolic process	-10	-7.5	ANM1
GO:0042773	ATP synthesis coupled electron transport	19_GO:0008152 metabolic process	-10	-7.3	ANM1
GO:0042775	mitochondrial ATP synthesis coupled electron transport	19_GO:0008152 metabolic process	-10	-7.3	ANM1
GO:0018130	heterocycle biosynthetic process	19_GO:0008152 metabolic process	-9.8	-7.1	ANM1
GO:0002181	cytoplasmic translation	19_GO:0008152 metabolic process	-9.8	-7.1	ANM1
GO:0019438	aromatic compound biosynthetic process	19_GO:0008152 metabolic process	-9.6	-7	ANM1
GO:0032981	mitochondrial respiratory chain complex I assembly	19_GO:0009987 cellular process	-9.1	-6.4	ANM1
GO:0010257	NADH dehydrogenase complex assembly	19_GO:0009987 cellular process	-9.1	-6.4	ANM1
GO:0042776	mitochondrial ATP synthesis coupled proton transport	19_GO:0051179 localization	-9	-6.3	ANM1
GO:0042273	ribosomal large subunit biogenesis	19_GO:0009987 cellular process	-8.9	-6.2	ANM1
GO:0034654	nucleobase-containing compound biosynthetic process	19_GO:0008152 metabolic process	-8.3	-5.7	ANM1
GO:0033108	mitochondrial respiratory chain complex assembly	19_GO:0009987 cellular process	-8.2	-5.6	ANM1
GO:0006352	DNA-templated transcription, initiation	19_GO:0008152 metabolic process	-8.1	-5.6	ANM1
GO:0006839	mitochondrial transport	19_GO:0051179 localization	-8.1	-5.6	ANM1
GO:0022900	electron transport chain	19_GO:0008152 metabolic process	-8.1	-5.5	ANM1
GO:0015986	ATP synthesis coupled proton transport	19_GO:0051179 localization	-7.5	-5	ANM1
GO:0015985	energy coupled proton transport, down electrochemical gradient	19_GO:0051179 localization	-7.5	-5	ANM1
GO:0006417	regulation of translation	19_GO:0008152 metabolic process	-7	-4.5	ANM1
GO:0009206	purine ribonucleoside triphosphate biosynthetic process	19_GO:0008152 metabolic process	-7	-4.5	ANM1
GO:0009145	purine nucleoside triphosphate biosynthetic process	19_GO:0008152 metabolic process	-6.9	-4.4	ANM1
GO:0006367	transcription initiation from RNA polymerase II promoter	19_GO:0008152 metabolic process	-6.8	-4.4	ANM1
GO:0009205	purine ribonucleoside triphosphate metabolic process	19_GO:0008152 metabolic process	-6.7	-4.3	ANM1
GO:0034248	regulation of cellular amide metabolic process	19_GO:0008152 metabolic process	-6.7	-4.3	ANM1
GO:0000470	maturation of LSU-rRNA	19_GO:0008152 metabolic process	-6.7	-4.3	ANM1
GO:0033365	protein localization to organelle	19_GO:0051179 localization	-6.6	-4.2	ANM1
GO:0009201	ribonucleoside triphosphate biosynthetic process	19_GO:0008152 metabolic process	-6.5	-4	ANM1
GO:0009144	purine nucleoside triphosphate metabolic process	19_GO:0008152 metabolic process	-6.4	-4	ANM1
GO:0022618	ribonucleoprotein complex assembly	19_GO:0009987 cellular process	-6.3	-3.9	ANM1
GO:0009199	ribonucleoside triphosphate metabolic process	19_GO:0008152 metabolic process	-6.2	-3.9	ANM1
GO:0016071	mRNA metabolic process	19_GO:0008152 metabolic process	-6.2	-3.9	ANM1
GO:0008380	RNA splicing	19_GO:0008152 metabolic process	-6.2	-3.8	ANM1
GO:2001242	regulation of intrinsic apoptotic signaling pathway	19_GO:0023052 signaling	-6.1	-3.8	ANM1
GO:0071826	ribonucleoprotein complex subunit organization	19_GO:0009987 cellular process	-6	-3.7	ANM1
GO:0006120	mitochondrial electron transport, NADH to ubiquinone	19_GO:0008152 metabolic process	-6	-3.7	ANM1
GO:0006754	ATP biosynthetic process	19_GO:0008152 metabolic process	-5.9	-3.5	ANM1
GO:0009141	nucleoside triphosphate metabolic process	19_GO:0008152 metabolic process	-5.8	-3.5	ANM1
GO:0046700	heterocycle catabolic process	19_GO:0008152 metabolic process	-5.7	-3.4	ANM1
GO:0080135	regulation of cellular response to stress	19_GO:0050896 response to stimulus	-5.7	-3.4	ANM1
GO:1902600	proton transmembrane transport	19_GO:0051179 localization	-5.6	-3.3	ANM1
GO:0009142	nucleoside triphosphate biosynthetic process	19_GO:0008152 metabolic process	-5.6	-3.3	ANM1
GO:0044270	cellular nitrogen compound catabolic process	19_GO:0008152 metabolic process	-5.6	-3.3	ANM1
GO:0006164	purine nucleotide biosynthetic process	19_GO:0008152 metabolic process	-5.4	-3.1	ANM1
GO:0032774	RNA biosynthetic process	19_GO:0008152 metabolic process	-5.4	-3.1	ANM1
GO:0006886	intracellular protein transport	19_GO:0051179 localization	-5.3	-3.1	ANM1
GO:0009260	ribonucleotide biosynthetic process	19_GO:0008152 metabolic process	-5.2	-3	ANM1
GO:0019439	aromatic compound catabolic process	19_GO:0008152 metabolic process	-5.2	-3	ANM1
GO:0006397	mRNA processing	19_GO:0008152 metabolic process	-5.2	-3	ANM1
GO:0009067	aspartate family amino acid biosynthetic process	19_GO:0008152 metabolic process	-5.2	-2.9	ANM1
GO:0006351	transcription, DNA-templated	19_GO:0008152 metabolic process	-5.1	-2.9	ANM1
GO:0000375	RNA splicing, via transesterification reactions	19_GO:0008152 metabolic process	-5.1	-2.9	ANM1
GO:0072522	purine-containing compound biosynthetic process	19_GO:0008152 metabolic process	-5.1	-2.9	ANM1
GO:0097659	nucleic acid-templated transcription	19_GO:0008152 metabolic process	-5.1	-2.9	ANM1
GO:0042274	ribosomal small subunit biogenesis	19_GO:0009987 cellular process	-5.1	-2.9	ANM1
GO:0009152	purine ribonucleotide biosynthetic process	19_GO:0008152 metabolic process	-5	-2.8	ANM1
GO:0034655	nucleobase-containing compound catabolic process	19_GO:0008152 metabolic process	-5	-2.8	ANM1
GO:0046390	ribose phosphate biosynthetic process	19_GO:0008152 metabolic process	-5	-2.8	ANM1
GO:2001244	positive regulation of intrinsic apoptotic signaling pathway	19_GO:0023052 signaling	-4.9	-2.7	ANM1
GO:0006919	activation of cysteine-type endopeptidase activity involved in apoptotic process	19_GO:0048518 positive regulation of biological process	-4.9	-2.7	ANM1
GO:0042255	ribosome assembly	19_GO:0009987 cellular process	-4.8	-2.6	ANM1
GO:0009165	nucleotide biosynthetic process	19_GO:0008152 metabolic process	-4.8	-2.6	ANM1
GO:0070585	protein localization to mitochondrion	19_GO:0051179 localization	-4.8	-2.6	ANM1
GO:1901293	nucleoside phosphate biosynthetic process	19_GO:0008152 metabolic process	-4.7	-2.6	ANM1
GO:0000463	maturation of LSU-rRNA from tricistronic rRNA transcript (SSU-rRNA, 5.8S rRNA, LSU-rRNA)	19_GO:0008152 metabolic process	-4.7	-2.6	ANM1
GO:0000398	mRNA splicing, via spliceosome	19_GO:0008152 metabolic process	-4.7	-2.5	ANM1
GO:0000377	RNA splicing, via transesterification reactions with bulged adenosine as nucleophile	19_GO:0008152 metabolic process	-4.7	-2.5	ANM1
GO:0032543	mitochondrial translation	19_GO:0008152 metabolic process	-4.7	-2.5	ANM1
GO:1901361	organic cyclic compound catabolic process	19_GO:0008152 metabolic process	-4.7	-2.5	ANM1
GO:0030162	regulation of proteolysis	19_GO:0008152 metabolic process	-4.6	-2.5	ANM1
GO:1903050	regulation of proteolysis involved in cellular protein catabolic process	19_GO:0008152 metabolic process	-4.6	-2.4	ANM1
GO:2001233	regulation of apoptotic signaling pathway	19_GO:0023052 signaling	-4.6	-2.4	ANM1
GO:0030163	protein catabolic process	19_GO:0008152 metabolic process	-4.5	-2.4	ANM1
GO:0055086	nucleobase-containing small molecule metabolic process	19_GO:0008152 metabolic process	-4.4	-2.3	ANM1
GO:0009451	RNA modification	19_GO:0008152 metabolic process	-4.3	-2.3	ANM1
GO:0072655	establishment of protein localization to mitochondrion	19_GO:0051179 localization	-4.3	-2.3	ANM1
GO:0032259	methylation	19_GO:0008152 metabolic process	-4.3	-2.2	ANM1
GO:0009117	nucleotide metabolic process	19_GO:0008152 metabolic process	-4.3	-2.2	ANM1
GO:0043414	macromolecule methylation	19_GO:0008152 metabolic process	-4.3	-2.2	ANM1
GO:1903362	regulation of cellular protein catabolic process	19_GO:0008152 metabolic process	-4.3	-2.2	ANM1
GO:1990182	exosomal secretion	19_GO:0051179 localization	-4.3	-2.2	ANM1
GO:0062197	cellular response to chemical stress	19_GO:0050896 response to stimulus	-4.3	-2.2	ANM1
GO:0072521	purine-containing compound metabolic process	19_GO:0008152 metabolic process	-4.2	-2.2	ANM1
GO:0000302	response to reactive oxygen species	19_GO:0050896 response to stimulus	-4.2	-2.2	ANM1
GO:0044257	cellular protein catabolic process	19_GO:0008152 metabolic process	-4.1	-2.1	ANM1
GO:0006753	nucleoside phosphate metabolic process	19_GO:0008152 metabolic process	-4.1	-2.1	ANM1
GO:0006163	purine nucleotide metabolic process	19_GO:0008152 metabolic process	-4.1	-2.1	ANM1
GO:0045862	positive regulation of proteolysis	19_GO:0048518 positive regulation of biological process	-4.1	-2	ANM1
GO:0030150	protein import into mitochondrial matrix	19_GO:0051179 localization	-4.1	-2	ANM1
GO:2001235	positive regulation of apoptotic signaling pathway	19_GO:0023052 signaling	-4.1	-2	ANM1
GO:0007346	regulation of mitotic cell cycle	19_GO:0050789 regulation of biological process	-4	-2	ANM1
GO:0006122	mitochondrial electron transport, ubiquinol to cytochrome c	19_GO:0008152 metabolic process	-4	-2	ANM1
GO:0009259	ribonucleotide metabolic process	19_GO:0008152 metabolic process	-4	-2	ANM1
GO:0006401	RNA catabolic process	19_GO:0008152 metabolic process	-4	-2	ANM1
GO:0000956	nuclear-transcribed mRNA catabolic process	19_GO:0048519 negative regulation of biological process	-4	-2	ANM1
GO:0000245	spliceosomal complex assembly	19_GO:0008152 metabolic process	-4	-2	ANM1
GO:0006366	transcription by RNA polymerase II	19_GO:0008152 metabolic process	-4	-2	ANM1
GO:0034614	cellular response to reactive oxygen species	19_GO:0050896 response to stimulus	-3.9	-2	ANM1
GO:0006457	protein folding	19_GO:0009987 cellular process	-3.9	-1.9	ANM1
GO:0009150	purine ribonucleotide metabolic process	19_GO:0008152 metabolic process	-3.9	-1.9	ANM1
GO:0090407	organophosphate biosynthetic process	19_GO:0008152 metabolic process	-3.9	-1.9	ANM1
GO:0009086	methionine biosynthetic process	19_GO:0008152 metabolic process	-3.9	-1.9	ANM1
GO:0019693	ribose phosphate metabolic process	19_GO:0008152 metabolic process	-3.8	-1.9	ANM1
GO:0140053	mitochondrial gene expression	19_GO:0008152 metabolic process	-3.8	-1.9	ANM1
GO:0045727	positive regulation of translation	19_GO:0048518 positive regulation of biological process	-3.8	-1.9	ANM1
GO:0001510	RNA methylation	19_GO:0008152 metabolic process	-3.8	-1.9	ANM1
GO:0006402	mRNA catabolic process	19_GO:0048519 negative regulation of biological process	-3.8	-1.8	ANM1
GO:1901796	regulation of signal transduction by p53 class mediator	19_GO:0023052 signaling	-3.8	-1.8	ANM1
GO:2000058	regulation of ubiquitin-dependent protein catabolic process	19_GO:0008152 metabolic process	-3.7	-1.8	ANM1
GO:0034250	positive regulation of cellular amide metabolic process	19_GO:0048518 positive regulation of biological process	-3.7	-1.8	ANM1
GO:0045116	protein neddylation	19_GO:0008152 metabolic process	-3.7	-1.8	ANM1
GO:0043280	positive regulation of cysteine-type endopeptidase activity involved in apoptotic process	19_GO:0048518 positive regulation of biological process	-3.7	-1.8	ANM1
GO:0018205	peptidyl-lysine modification	19_GO:0008152 metabolic process	-3.6	-1.7	ANM1
GO:0010498	proteasomal protein catabolic process	19_GO:0008152 metabolic process	-3.6	-1.7	ANM1
GO:0034599	cellular response to oxidative stress	19_GO:0050896 response to stimulus	-3.6	-1.7	ANM1
GO:0097734	extracellular exosome biogenesis	19_GO:0009987 cellular process	-3.6	-1.7	ANM1
GO:0035694	mitochondrial protein catabolic process	19_GO:0008152 metabolic process	-3.6	-1.7	ANM1
GO:0006605	protein targeting	19_GO:0051179 localization	-3.6	-1.7	ANM1
GO:1901657	glycosyl compound metabolic process	19_GO:0008152 metabolic process	-3.6	-1.7	ANM1
GO:1901990	regulation of mitotic cell cycle phase transition	19_GO:0050789 regulation of biological process	-3.6	-1.7	ANM1
GO:0018198	peptidyl-cysteine modification	19_GO:0008152 metabolic process	-3.5	-1.6	ANM1
GO:0031163	metallo-sulfur cluster assembly	19_GO:0009987 cellular process	-3.5	-1.6	ANM1
GO:0016226	iron-sulfur cluster assembly	19_GO:0008152 metabolic process	-3.5	-1.6	ANM1
GO:0051603	proteolysis involved in cellular protein catabolic process	19_GO:0008152 metabolic process	-3.5	-1.6	ANM1
GO:0051604	protein maturation	19_GO:0008152 metabolic process	-3.4	-1.6	ANM1
GO:0031331	positive regulation of cellular catabolic process	19_GO:0048518 positive regulation of biological process	-3.4	-1.5	ANM1
GO:0006626	protein targeting to mitochondrion	19_GO:0051179 localization	-3.4	-1.5	ANM1
GO:0140507	granzyme-mediated programmed cell death signaling pathway	19_GO:0023052 signaling	-3.4	-1.5	ANM1
GO:0032088	negative regulation of NF-kappaB transcription factor activity	19_GO:0008152 metabolic process	-3.4	-1.5	ANM1
GO:0006555	methionine metabolic process	19_GO:0008152 metabolic process	-3.3	-1.5	ANM1
GO:0097428	protein maturation by iron-sulfur cluster transfer	19_GO:0008152 metabolic process	-3.3	-1.5	ANM1
GO:0006974	cellular response to DNA damage stimulus	19_GO:0050896 response to stimulus	-3.3	-1.5	ANM1
GO:0065004	protein-DNA complex assembly	19_GO:0009987 cellular process	-3.2	-1.4	ANM1
GO:0000097	sulfur amino acid biosynthetic process	19_GO:0008152 metabolic process	-3.2	-1.4	ANM1
GO:0002262	myeloid cell homeostasis	19_GO:0002376 immune system process	-3.2	-1.4	ANM1
GO:2001056	positive regulation of cysteine-type endopeptidase activity	19_GO:0048518 positive regulation of biological process	-3.2	-1.4	ANM1
GO:1900101	regulation of endoplasmic reticulum unfolded protein response	19_GO:0023052 signaling	-3.2	-1.4	ANM1
GO:0071824	protein-DNA complex subunit organization	19_GO:0009987 cellular process	-3.2	-1.4	ANM1
GO:0140112	extracellular vesicle biogenesis	19_GO:0009987 cellular process	-3.2	-1.4	ANM1
GO:0006984	ER-nucleus signaling pathway	19_GO:0023052 signaling	-3.1	-1.3	ANM1
GO:0097193	intrinsic apoptotic signaling pathway	19_GO:0023052 signaling	-3.1	-1.3	ANM1
GO:0008033	tRNA processing	19_GO:0008152 metabolic process	-3.1	-1.3	ANM1
GO:0042026	protein refolding	19_GO:0009987 cellular process	-3	-1.3	ANM1
GO:0042542	response to hydrogen peroxide	19_GO:0050896 response to stimulus	-3	-1.2	ANM1
GO:0010950	positive regulation of endopeptidase activity	19_GO:0048518 positive regulation of biological process	-3	-1.2	ANM1
GO:0043065	positive regulation of apoptotic process	19_GO:0048518 positive regulation of biological process	-3	-1.2	ANM1
GO:0001188	RNA polymerase I preinitiation complex assembly	19_GO:0008152 metabolic process	-3	-1.2	ANM1
GO:0070897	transcription preinitiation complex assembly	19_GO:0008152 metabolic process	-3	-1.2	ANM1
GO:0009066	aspartate family amino acid metabolic process	19_GO:0008152 metabolic process	-3	-1.2	ANM1
GO:2001022	positive regulation of response to DNA damage stimulus	19_GO:0048518 positive regulation of biological process	-3	-1.2	ANM1
GO:0006790	sulfur compound metabolic process	19_GO:0008152 metabolic process	-3	-1.2	ANM1
GO:1901987	regulation of cell cycle phase transition	19_GO:0050789 regulation of biological process	-3	-1.2	ANM1
GO:0009896	positive regulation of catabolic process	19_GO:0048518 positive regulation of biological process	-3	-1.2	ANM1
GO:0006399	tRNA metabolic process	19_GO:0008152 metabolic process	-2.9	-1.2	ANM1
GO:0000387	spliceosomal snRNP assembly	19_GO:0008152 metabolic process	-2.9	-1.2	ANM1
GO:0051262	protein tetramerization	19_GO:0009987 cellular process	-2.9	-1.2	ANM1
GO:0048193	Golgi vesicle transport	19_GO:0051179 localization	-2.9	-1.2	ANM1
GO:0032446	protein modification by small protein conjugation	19_GO:0008152 metabolic process	-2.9	-1.2	ANM1
GO:2000116	regulation of cysteine-type endopeptidase activity	19_GO:0008152 metabolic process	-2.9	-1.2	ANM1
GO:0032200	telomere organization	19_GO:0009987 cellular process	-2.9	-1.2	ANM1
GO:0043281	regulation of cysteine-type endopeptidase activity involved in apoptotic process	19_GO:0008152 metabolic process	-2.9	-1.2	ANM1
GO:1903364	positive regulation of cellular protein catabolic process	19_GO:0048518 positive regulation of biological process	-2.9	-1.1	ANM1
GO:1903052	positive regulation of proteolysis involved in cellular protein catabolic process	19_GO:0048518 positive regulation of biological process	-2.9	-1.1	ANM1
GO:0043653	mitochondrial fragmentation involved in apoptotic process	19_GO:0009987 cellular process	-2.8	-1.1	ANM1
GO:0065002	intracellular protein transmembrane transport	19_GO:0051179 localization	-2.8	-1.1	ANM1
GO:0043068	positive regulation of programmed cell death	19_GO:0048518 positive regulation of biological process	-2.8	-1.1	ANM1
GO:0001906	cell killing	19_GO:0009987 cellular process	-2.8	-1.1	ANM1
GO:0061844	antimicrobial humoral immune response mediated by antimicrobial peptide	19_GO:0044419 biological process involved in interspecies interaction between organisms	-2.8	-1.1	ANM1
GO:0051881	regulation of mitochondrial membrane potential	19_GO:0065007 biological regulation	-2.8	-1.1	ANM1
GO:0044743	protein transmembrane import into intracellular organelle	19_GO:0051179 localization	-2.8	-1.1	ANM1
GO:0043543	protein acylation	19_GO:0008152 metabolic process	-2.8	-1.1	ANM1
GO:0090150	establishment of protein localization to membrane	19_GO:0051179 localization	-2.8	-1.1	ANM1
GO:1905168	positive regulation of double-strand break repair via homologous recombination	19_GO:0048518 positive regulation of biological process	-2.8	-1.1	ANM1
GO:0051301	cell division	19_GO:0009987 cellular process	-2.7	-1.1	ANM1
GO:0072594	establishment of protein localization to organelle	19_GO:0051179 localization	-2.7	-1.1	ANM1
GO:0031396	regulation of protein ubiquitination	19_GO:0008152 metabolic process	-2.7	-1.1	ANM1
GO:0006289	nucleotide-excision repair	19_GO:0050896 response to stimulus	-2.7	-1.1	ANM1
GO:0051205	protein insertion into membrane	19_GO:0051179 localization	-2.7	-1.1	ANM1
GO:0018026	peptidyl-lysine monomethylation	19_GO:0008152 metabolic process	-2.7	-1.1	ANM1
GO:0010917	negative regulation of mitochondrial membrane potential	19_GO:0065007 biological regulation	-2.7	-1.1	ANM1
GO:0051561	positive regulation of mitochondrial calcium ion concentration	19_GO:0065007 biological regulation	-2.7	-1.1	ANM1
GO:0045837	negative regulation of membrane potential	19_GO:0065007 biological regulation	-2.7	-1.1	ANM1
GO:0061136	regulation of proteasomal protein catabolic process	19_GO:0008152 metabolic process	-2.7	-1	ANM1
GO:0000288	nuclear-transcribed mRNA catabolic process, deadenylation-dependent decay	19_GO:0048519 negative regulation of biological process	-2.7	-1	ANM1
GO:0010952	positive regulation of peptidase activity	19_GO:0048518 positive regulation of biological process	-2.6	-1	ANM1
GO:0090342	regulation of cell aging	19_GO:0032502 developmental process	-2.6	-1	ANM1
GO:0051289	protein homotetramerization	19_GO:0009987 cellular process	-2.6	-1	ANM1
GO:1903320	regulation of protein modification by small protein conjugation or removal	19_GO:0008152 metabolic process	-2.6	-0.98	ANM1
GO:2001020	regulation of response to DNA damage stimulus	19_GO:0050896 response to stimulus	-2.6	-0.98	ANM1
GO:0006983	ER overload response	19_GO:0023052 signaling	-2.6	-0.97	ANM1
GO:0010457	centriole-centriole cohesion	19_GO:0009987 cellular process	-2.6	-0.97	ANM1
GO:0006465	signal peptide processing	19_GO:0008152 metabolic process	-2.6	-0.97	ANM1
GO:0043161	proteasome-mediated ubiquitin-dependent protein catabolic process	19_GO:0008152 metabolic process	-2.6	-0.97	ANM1
GO:0000723	telomere maintenance	19_GO:0008152 metabolic process	-2.6	-0.94	ANM1
GO:0009154	purine ribonucleotide catabolic process	19_GO:0008152 metabolic process	-2.6	-0.94	ANM1
GO:0010942	positive regulation of cell death	19_GO:0048518 positive regulation of biological process	-2.5	-0.93	ANM1
GO:0070997	neuron death	19_GO:0009987 cellular process	-2.5	-0.92	ANM1
GO:0006979	response to oxidative stress	19_GO:0050896 response to stimulus	-2.5	-0.91	ANM1
GO:0006360	transcription by RNA polymerase I	19_GO:0008152 metabolic process	-2.5	-0.91	ANM1
GO:0042176	regulation of protein catabolic process	19_GO:0008152 metabolic process	-2.5	-0.9	ANM1
GO:0006446	regulation of translational initiation	19_GO:0008152 metabolic process	-2.5	-0.9	ANM1
GO:0018202	peptidyl-histidine modification	19_GO:0008152 metabolic process	-2.5	-0.9	ANM1
GO:0006361	transcription initiation from RNA polymerase I promoter	19_GO:0008152 metabolic process	-2.5	-0.9	ANM1
GO:0043632	modification-dependent macromolecule catabolic process	19_GO:0008152 metabolic process	-2.5	-0.9	ANM1
GO:0046434	organophosphate catabolic process	19_GO:0008152 metabolic process	-2.5	-0.89	ANM1
GO:1901292	nucleoside phosphate catabolic process	19_GO:0008152 metabolic process	-2.5	-0.89	ANM1
GO:0006403	RNA localization	19_GO:0051179 localization	-2.5	-0.88	ANM1
GO:0071887	leukocyte apoptotic process	19_GO:0009987 cellular process	-2.4	-0.87	ANM1
GO:0000027	ribosomal large subunit assembly	19_GO:0009987 cellular process	-2.4	-0.87	ANM1
GO:0002227	innate immune response in mucosa	19_GO:0044419 biological process involved in interspecies interaction between organisms	-2.4	-0.87	ANM1
GO:0000725	recombinational repair	19_GO:0050896 response to stimulus	-2.4	-0.87	ANM1
GO:0050657	nucleic acid transport	19_GO:0051179 localization	-2.4	-0.87	ANM1
GO:0050658	RNA transport	19_GO:0051179 localization	-2.4	-0.87	ANM1
GO:0009116	nucleoside metabolic process	19_GO:0008152 metabolic process	-2.4	-0.87	ANM1
GO:0071806	protein transmembrane transport	19_GO:0051179 localization	-2.4	-0.87	ANM1
GO:0006413	translational initiation	19_GO:0008152 metabolic process	-2.4	-0.87	ANM1
GO:0061014	positive regulation of mRNA catabolic process	19_GO:0048519 negative regulation of biological process	-2.4	-0.86	ANM1
GO:0006085	acetyl-CoA biosynthetic process	19_GO:0008152 metabolic process	-2.4	-0.86	ANM1
GO:1903894	regulation of IRE1-mediated unfolded protein response	19_GO:0023052 signaling	-2.4	-0.86	ANM1
GO:0000722	telomere maintenance via recombination	19_GO:0008152 metabolic process	-2.4	-0.86	ANM1
GO:0051236	establishment of RNA localization	19_GO:0051179 localization	-2.4	-0.85	ANM1
GO:0006511	ubiquitin-dependent protein catabolic process	19_GO:0008152 metabolic process	-2.4	-0.85	ANM1
GO:2000781	positive regulation of double-strand break repair	19_GO:0048518 positive regulation of biological process	-2.4	-0.85	ANM1
GO:0006195	purine nucleotide catabolic process	19_GO:0008152 metabolic process	-2.4	-0.85	ANM1
GO:0016485	protein processing	19_GO:0008152 metabolic process	-2.4	-0.83	ANM1
GO:0048872	homeostasis of number of cells	19_GO:0065007 biological regulation	-2.3	-0.82	ANM1
GO:0009261	ribonucleotide catabolic process	19_GO:0008152 metabolic process	-2.3	-0.82	ANM1
GO:0090199	regulation of release of cytochrome c from mitochondria	19_GO:0023052 signaling	-2.3	-0.82	ANM1
GO:0055076	transition metal ion homeostasis	19_GO:0065007 biological regulation	-2.3	-0.82	ANM1
GO:0043467	regulation of generation of precursor metabolites and energy	19_GO:0008152 metabolic process	-2.3	-0.8	ANM1
GO:0006400	tRNA modification	19_GO:0008152 metabolic process	-2.3	-0.79	ANM1
GO:0019941	modification-dependent protein catabolic process	19_GO:0008152 metabolic process	-2.3	-0.78	ANM1
GO:1901607	alpha-amino acid biosynthetic process	19_GO:0008152 metabolic process	-2.3	-0.78	ANM1
GO:0070301	cellular response to hydrogen peroxide	19_GO:0050896 response to stimulus	-2.3	-0.78	ANM1
GO:0097190	apoptotic signaling pathway	19_GO:0023052 signaling	-2.3	-0.78	ANM1
GO:0010165	response to X-ray	19_GO:0050896 response to stimulus	-2.3	-0.78	ANM1
GO:0070979	protein K11-linked ubiquitination	19_GO:0008152 metabolic process	-2.3	-0.78	ANM1
GO:0045948	positive regulation of translational initiation	19_GO:0048518 positive regulation of biological process	-2.3	-0.78	ANM1
GO:1903578	regulation of ATP metabolic process	19_GO:0008152 metabolic process	-2.3	-0.78	ANM1
GO:0018022	peptidyl-lysine methylation	19_GO:0008152 metabolic process	-2.3	-0.78	ANM1
GO:0007017	microtubule-based process	19_GO:0009987 cellular process	-2.3	-0.77	ANM1
GO:0098662	inorganic cation transmembrane transport	19_GO:0051179 localization	-2.3	-0.77	ANM1
GO:0061157	mRNA destabilization	19_GO:0048519 negative regulation of biological process	-2.3	-0.77	ANM1
GO:0032434	regulation of proteasomal ubiquitin-dependent protein catabolic process	19_GO:0008152 metabolic process	-2.3	-0.76	ANM1
GO:0098869	cellular oxidant detoxification	19_GO:0098754 detoxification	-2.2	-0.76	ANM1
GO:0006479	protein methylation	19_GO:0008152 metabolic process	-2.2	-0.75	ANM1
GO:0008213	protein alkylation	19_GO:0008152 metabolic process	-2.2	-0.75	ANM1
GO:1903313	positive regulation of mRNA metabolic process	19_GO:0048518 positive regulation of biological process	-2.2	-0.75	ANM1
GO:0048490	anterograde synaptic vesicle transport	19_GO:0051179 localization	-2.2	-0.75	ANM1
GO:0006851	mitochondrial calcium ion transmembrane transport	19_GO:0051179 localization	-2.2	-0.75	ANM1
GO:0099514	synaptic vesicle cytoskeletal transport	19_GO:0051179 localization	-2.2	-0.75	ANM1
GO:0099517	synaptic vesicle transport along microtubule	19_GO:0051179 localization	-2.2	-0.75	ANM1
GO:0070231	T cell apoptotic process	19_GO:0009987 cellular process	-2.2	-0.75	ANM1
GO:0033137	negative regulation of peptidyl-serine phosphorylation	19_GO:0048519 negative regulation of biological process	-2.2	-0.75	ANM1
GO:2000772	regulation of cellular senescence	19_GO:0032502 developmental process	-2.2	-0.75	ANM1
GO:0007093	mitotic cell cycle checkpoint signaling	19_GO:0023052 signaling	-2.2	-0.74	ANM1
GO:0010569	regulation of double-strand break repair via homologous recombination	19_GO:0050896 response to stimulus	-2.2	-0.74	ANM1
GO:0051668	localization within membrane	19_GO:0051179 localization	-2.2	-0.74	ANM1
GO:1903322	positive regulation of protein modification by small protein conjugation or removal	19_GO:0048518 positive regulation of biological process	-2.2	-0.74	ANM1
GO:0044272	sulfur compound biosynthetic process	19_GO:0008152 metabolic process	-2.2	-0.74	ANM1
GO:0043457	regulation of cellular respiration	19_GO:0008152 metabolic process	-2.2	-0.73	ANM1
GO:0072523	purine-containing compound catabolic process	19_GO:0008152 metabolic process	-2.2	-0.73	ANM1
GO:1901800	positive regulation of proteasomal protein catabolic process	19_GO:0048518 positive regulation of biological process	-2.2	-0.73	ANM1
GO:0010212	response to ionizing radiation	19_GO:0050896 response to stimulus	-2.2	-0.73	ANM1
GO:1902253	regulation of intrinsic apoptotic signaling pathway by p53 class mediator	19_GO:0023052 signaling	-2.2	-0.73	ANM1
GO:0000096	sulfur amino acid metabolic process	19_GO:0008152 metabolic process	-2.2	-0.73	ANM1
GO:0034394	protein localization to cell surface	19_GO:0051179 localization	-2.2	-0.73	ANM1
GO:0006970	response to osmotic stress	19_GO:0050896 response to stimulus	-2.2	-0.72	ANM1
GO:0010506	regulation of autophagy	19_GO:0008152 metabolic process	-2.2	-0.71	ANM1
GO:0045739	positive regulation of DNA repair	19_GO:0048518 positive regulation of biological process	-2.1	-0.71	ANM1
GO:0009166	nucleotide catabolic process	19_GO:0008152 metabolic process	-2.1	-0.7	ANM1
GO:0050779	RNA destabilization	19_GO:0048518 positive regulation of biological process	-2.1	-0.7	ANM1
GO:0010822	positive regulation of mitochondrion organization	19_GO:0048518 positive regulation of biological process	-2.1	-0.7	ANM1
GO:0008652	cellular amino acid biosynthetic process	19_GO:0008152 metabolic process	-2.1	-0.7	ANM1
GO:0010821	regulation of mitochondrion organization	19_GO:0050789 regulation of biological process	-2.1	-0.7	ANM1
GO:0006336	DNA replication-independent chromatin assembly	19_GO:0009987 cellular process	-2.1	-0.7	ANM1
GO:1903715	regulation of aerobic respiration	19_GO:0008152 metabolic process	-2.1	-0.7	ANM1
GO:0048489	synaptic vesicle transport	19_GO:0051179 localization	-2.1	-0.7	ANM1
GO:0051402	neuron apoptotic process	19_GO:0009987 cellular process	-2.1	-0.69	ANM1
GO:0140694	non-membrane-bounded organelle assembly	19_GO:0009987 cellular process	-2.1	-0.69	ANM1
GO:0006473	protein acetylation	19_GO:0008152 metabolic process	-2.1	-0.68	ANM1
GO:0000075	cell cycle checkpoint signaling	19_GO:0023052 signaling	-2.1	-0.68	ANM1
GO:1902850	microtubule cytoskeleton organization involved in mitosis	19_GO:0009987 cellular process	-2.1	-0.68	ANM1
GO:1901797	negative regulation of signal transduction by p53 class mediator	19_GO:0023052 signaling	-2.1	-0.67	ANM1
GO:0034724	DNA replication-independent chromatin organization	19_GO:0009987 cellular process	-2.1	-0.67	ANM1
GO:0007031	peroxisome organization	19_GO:0009987 cellular process	-2.1	-0.67	ANM1
GO:0006123	mitochondrial electron transport, cytochrome c to oxygen	19_GO:0008152 metabolic process	-2.1	-0.67	ANM1
GO:0043217	myelin maintenance	19_GO:0032502 developmental process	-2.1	-0.67	ANM1
GO:0008631	intrinsic apoptotic signaling pathway in response to oxidative stress	19_GO:0023052 signaling	-2.1	-0.67	ANM1
GO:0031398	positive regulation of protein ubiquitination	19_GO:0048518 positive regulation of biological process	-2.1	-0.67	ANM1
GO:2001234	negative regulation of apoptotic signaling pathway	19_GO:0023052 signaling	-2.1	-0.67	ANM1
GO:0055080	cation homeostasis	19_GO:0065007 biological regulation	-2.1	-0.66	ANM1
GO:0034101	erythrocyte homeostasis	19_GO:0002376 immune system process	-2	-0.65	ANM1
GO:0010970	transport along microtubule	19_GO:0051179 localization	-2	-0.65	ANM1
GO:1903047	mitotic cell cycle process	19_GO:0009987 cellular process	-2	-0.65	ANM1
GO:0006281	DNA repair	19_GO:0050896 response to stimulus	-2	-0.64	ANM1
GO:0046649	lymphocyte activation	19_GO:0002376 immune system process	-2	-0.64	ANM1
GO:0043687	post-translational protein modification	19_GO:0008152 metabolic process	-2	-0.64	ANM1
GO:0000460	maturation of 5.8S rRNA	19_GO:0008152 metabolic process	-2	-0.64	ANM1
GO:0002523	leukocyte migration involved in inflammatory response	19_GO:0040011 locomotion	-2	-0.63	ANM1
GO:1990000	amyloid fibril formation	19_GO:0008152 metabolic process	-2	-0.63	ANM1
GO:0071545	inositol phosphate catabolic process	19_GO:0008152 metabolic process	-2	-0.63	ANM1
GO:0048678	response to axon injury	19_GO:0050896 response to stimulus	-2	-0.63	ANM1
GO:0002181	cytoplasmic translation	19_GO:0008152 metabolic process	-8.1	-5.6	ANM2
GO:0006518	peptide metabolic process	19_GO:0008152 metabolic process	-5.7	-3.4	ANM2
GO:0006412	translation	19_GO:0008152 metabolic process	-4.6	-2.5	ANM2
GO:0006974	cellular response to DNA damage stimulus	19_GO:0050896 response to stimulus	-4.3	-2.3	ANM2
GO:0043043	peptide biosynthetic process	19_GO:0008152 metabolic process	-4.3	-2.2	ANM2
GO:0042255	ribosome assembly	19_GO:0009987 cellular process	-4.1	-2.1	ANM2
GO:0043603	cellular amide metabolic process	19_GO:0008152 metabolic process	-4.1	-2	ANM2
GO:0006281	DNA repair	19_GO:0050896 response to stimulus	-3.9	-1.9	ANM2
GO:0043604	amide biosynthetic process	19_GO:0008152 metabolic process	-3.8	-1.9	ANM2
GO:0030330	DNA damage response, signal transduction by p53 class mediator	19_GO:0023052 signaling	-3.7	-1.7	ANM2
GO:0000413	protein peptidyl-prolyl isomerization	19_GO:0008152 metabolic process	-3.7	-1.7	ANM2
GO:0044773	mitotic DNA damage checkpoint signaling	19_GO:0023052 signaling	-3.6	-1.7	ANM2
GO:0006977	DNA damage response, signal transduction by p53 class mediator resulting in cell cycle arrest	19_GO:0023052 signaling	-3.6	-1.7	ANM2
GO:0031647	regulation of protein stability	19_GO:0065007 biological regulation	-3.5	-1.6	ANM2
GO:0044774	mitotic DNA integrity checkpoint signaling	19_GO:0023052 signaling	-3.5	-1.6	ANM2
GO:0006337	nucleosome disassembly	19_GO:0009987 cellular process	-3.5	-1.6	ANM2
GO:0031498	chromatin disassembly	19_GO:0009987 cellular process	-3.5	-1.6	ANM2
GO:0032986	protein-DNA complex disassembly	19_GO:0009987 cellular process	-3.4	-1.5	ANM2
GO:0070129	regulation of mitochondrial translation	19_GO:0008152 metabolic process	-3.2	-1.4	ANM2
GO:0018208	peptidyl-proline modification	19_GO:0008152 metabolic process	-3.1	-1.3	ANM2
GO:0000077	DNA damage checkpoint signaling	19_GO:0023052 signaling	-3.1	-1.3	ANM2
GO:0010948	negative regulation of cell cycle process	19_GO:0048519 negative regulation of biological process	-3.1	-1.3	ANM2
GO:0000027	ribosomal large subunit assembly	19_GO:0009987 cellular process	-3.1	-1.3	ANM2
GO:0062125	regulation of mitochondrial gene expression	19_GO:0008152 metabolic process	-3	-1.2	ANM2
GO:0031571	mitotic G1 DNA damage checkpoint signaling	19_GO:0023052 signaling	-3	-1.2	ANM2
GO:0031570	DNA integrity checkpoint signaling	19_GO:0023052 signaling	-2.9	-1.2	ANM2
GO:0044819	mitotic G1/S transition checkpoint signaling	19_GO:0023052 signaling	-2.9	-1.2	ANM2
GO:1901988	negative regulation of cell cycle phase transition	19_GO:0048519 negative regulation of biological process	-2.9	-1.2	ANM2
GO:0006694	steroid biosynthetic process	19_GO:0008152 metabolic process	-2.9	-1.2	ANM2
GO:1901991	negative regulation of mitotic cell cycle phase transition	19_GO:0048519 negative regulation of biological process	-2.9	-1.2	ANM2
GO:0045737	positive regulation of cyclin-dependent protein serine/threonine kinase activity	19_GO:0048518 positive regulation of biological process	-2.9	-1.2	ANM2
GO:0007093	mitotic cell cycle checkpoint signaling	19_GO:0023052 signaling	-2.9	-1.2	ANM2
GO:0045070	positive regulation of viral genome replication	19_GO:0016032 viral process	-2.8	-1.1	ANM2
GO:0006259	DNA metabolic process	19_GO:0008152 metabolic process	-2.8	-1.1	ANM2
GO:0042273	ribosomal large subunit biogenesis	19_GO:0009987 cellular process	-2.8	-1.1	ANM2
GO:0016486	peptide hormone processing	19_GO:0008152 metabolic process	-2.8	-1.1	ANM2
GO:0001934	positive regulation of protein phosphorylation	19_GO:0048518 positive regulation of biological process	-2.7	-1.1	ANM2
GO:1904031	positive regulation of cyclin-dependent protein kinase activity	19_GO:0048518 positive regulation of biological process	-2.7	-1.1	ANM2
GO:1901990	regulation of mitotic cell cycle phase transition	19_GO:0050789 regulation of biological process	-2.7	-1	ANM2
GO:0140448	signaling receptor ligand precursor processing	19_GO:0008152 metabolic process	-2.7	-1	ANM2
GO:1902653	secondary alcohol biosynthetic process	19_GO:0008152 metabolic process	-2.7	-1	ANM2
GO:0006695	cholesterol biosynthetic process	19_GO:0008152 metabolic process	-2.7	-1	ANM2
GO:0050821	protein stabilization	19_GO:0065007 biological regulation	-2.6	-0.99	ANM2
GO:0090305	nucleic acid phosphodiester bond hydrolysis	19_GO:0008152 metabolic process	-2.6	-0.98	ANM2
GO:0008610	lipid biosynthetic process	19_GO:0008152 metabolic process	-2.6	-0.98	ANM2
GO:0052126	movement in host environment	19_GO:0044419 biological process involved in interspecies interaction between organisms	-2.6	-0.97	ANM2
GO:0042770	signal transduction in response to DNA damage	19_GO:0023052 signaling	-2.6	-0.97	ANM2
GO:0042445	hormone metabolic process	19_GO:0008152 metabolic process	-2.5	-0.94	ANM2
GO:1903047	mitotic cell cycle process	19_GO:0009987 cellular process	-2.5	-0.92	ANM2
GO:0000278	mitotic cell cycle	19_GO:0009987 cellular process	-2.5	-0.91	ANM2
GO:0072331	signal transduction by p53 class mediator	19_GO:0023052 signaling	-2.5	-0.9	ANM2
GO:0045058	T cell selection	19_GO:0002376 immune system process	-2.5	-0.9	ANM2
GO:0034644	cellular response to UV	19_GO:0050896 response to stimulus	-2.5	-0.88	ANM2
GO:0010564	regulation of cell cycle process	19_GO:0050789 regulation of biological process	-2.4	-0.87	ANM2
GO:0071902	positive regulation of protein serine/threonine kinase activity	19_GO:0048518 positive regulation of biological process	-2.4	-0.87	ANM2
GO:0016126	sterol biosynthetic process	19_GO:0008152 metabolic process	-2.4	-0.87	ANM2
GO:0000075	cell cycle checkpoint signaling	19_GO:0023052 signaling	-2.4	-0.87	ANM2
GO:2001252	positive regulation of chromosome organization	19_GO:0048518 positive regulation of biological process	-2.4	-0.87	ANM2
GO:0009411	response to UV	19_GO:0050896 response to stimulus	-2.4	-0.87	ANM2
GO:0051701	biological process involved in interaction with host	19_GO:0044419 biological process involved in interspecies interaction between organisms	-2.4	-0.86	ANM2
GO:0035304	regulation of protein dephosphorylation	19_GO:0008152 metabolic process	-2.4	-0.86	ANM2
GO:0032465	regulation of cytokinesis	19_GO:0050789 regulation of biological process	-2.4	-0.86	ANM2
GO:0045786	negative regulation of cell cycle	19_GO:0048519 negative regulation of biological process	-2.3	-0.82	ANM2
GO:0045930	negative regulation of mitotic cell cycle	19_GO:0048519 negative regulation of biological process	-2.3	-0.82	ANM2
GO:0042254	ribosome biogenesis	19_GO:0009987 cellular process	-2.3	-0.8	ANM2
GO:1902807	negative regulation of cell cycle G1/S phase transition	19_GO:0048519 negative regulation of biological process	-2.3	-0.79	ANM2
GO:0007080	mitotic metaphase plate congression	19_GO:0051179 localization	-2.3	-0.79	ANM2
GO:0000079	regulation of cyclin-dependent protein serine/threonine kinase activity	19_GO:0008152 metabolic process	-2.3	-0.78	ANM2
GO:2000045	regulation of G1/S transition of mitotic cell cycle	19_GO:0050789 regulation of biological process	-2.3	-0.77	ANM2
GO:0110020	regulation of actomyosin structure organization	19_GO:0050789 regulation of biological process	-2.2	-0.76	ANM2
GO:1904029	regulation of cyclin-dependent protein kinase activity	19_GO:0008152 metabolic process	-2.2	-0.76	ANM2
GO:0007585	respiratory gaseous exchange by respiratory system	19_GO:0032501 multicellular organismal process	-2.2	-0.75	ANM2
GO:0032206	positive regulation of telomere maintenance	19_GO:0048518 positive regulation of biological process	-2.2	-0.75	ANM2
GO:0051054	positive regulation of DNA metabolic process	19_GO:0048518 positive regulation of biological process	-2.2	-0.75	ANM2
GO:0000724	double-strand break repair via homologous recombination	19_GO:0050896 response to stimulus	-2.2	-0.75	ANM2
GO:0050900	leukocyte migration	19_GO:0040011 locomotion	-2.2	-0.75	ANM2
GO:0000086	G2/M transition of mitotic cell cycle	19_GO:0009987 cellular process	-2.2	-0.74	ANM2
GO:0071214	cellular response to abiotic stimulus	19_GO:0050896 response to stimulus	-2.2	-0.74	ANM2
GO:0104004	cellular response to environmental stimulus	19_GO:0050896 response to stimulus	-2.2	-0.74	ANM2
GO:0000725	recombinational repair	19_GO:0050896 response to stimulus	-2.2	-0.73	ANM2
GO:0002027	regulation of heart rate	19_GO:0032501 multicellular organismal process	-2.2	-0.73	ANM2
GO:0044839	cell cycle G2/M phase transition	19_GO:0009987 cellular process	-2.1	-0.7	ANM2
GO:0010638	positive regulation of organelle organization	19_GO:0048518 positive regulation of biological process	-2.1	-0.69	ANM2
GO:0016032	viral process	19_GO:0016032 viral process	-2.1	-0.67	ANM2
GO:0051301	cell division	19_GO:0009987 cellular process	-2.1	-0.67	ANM2
GO:0051310	metaphase plate congression	19_GO:0051179 localization	-2.1	-0.67	ANM2
GO:0071482	cellular response to light stimulus	19_GO:0050896 response to stimulus	-2.1	-0.67	ANM2
GO:0071478	cellular response to radiation	19_GO:0050896 response to stimulus	-2.1	-0.67	ANM2
GO:0019058	viral life cycle	19_GO:0016032 viral process	-2.1	-0.66	ANM2
GO:0051604	protein maturation	19_GO:0008152 metabolic process	-2.1	-0.66	ANM2
GO:0048524	positive regulation of viral process	19_GO:0016032 viral process	-2	-0.65	ANM2
GO:0008202	steroid metabolic process	19_GO:0008152 metabolic process	-2	-0.65	ANM2
GO:1901987	regulation of cell cycle phase transition	19_GO:0050789 regulation of biological process	-2	-0.64	ANM2
GO:1990748	cellular detoxification	19_GO:0098754 detoxification	-4	-2	ZIB
GO:0097237	cellular response to toxic substance	19_GO:0050896 response to stimulus	-3.9	-1.9	ZIB
GO:0098754	detoxification	19_GO:0098754 detoxification	-3.7	-1.8	ZIB
GO:0009636	response to toxic substance	19_GO:0050896 response to stimulus	-3	-1.2	ZIB
GO:0042742	defense response to bacterium	19_GO:0044419 biological process involved in interspecies interaction between organisms	-2.5	-0.9	ZIB
GO:1903706	regulation of hemopoiesis	19_GO:0002376 immune system process	-2.4	-0.86	ZIB
GO:0071396	cellular response to lipid	19_GO:0050896 response to stimulus	-2.1	-0.66	ZIB

## Sheet: Table S4
Table S4. The complete list of enriched terms in MCI compared with NC across different data cohorts.
GO	Description	PARENT_GO	LogP	Log(q-value)	GeneList
GO:0043434	response to peptide hormone	19_GO:0050896 response to stimulus	-4.1	-1.3	ADNI
GO:0000165	MAPK cascade	19_GO:0023052 signaling	-3.3	-0.92	ADNI
GO:1901652	response to peptide	19_GO:0050896 response to stimulus	-3.3	-0.91	ADNI
GO:0060627	regulation of vesicle-mediated transport	19_GO:0051179 localization	-3.1	-0.87	ADNI
GO:0048016	inositol phosphate-mediated signaling	19_GO:0023052 signaling	-3.1	-0.87	ADNI
GO:0071875	adrenergic receptor signaling pathway	19_GO:0023052 signaling	-3.1	-0.87	ADNI
GO:0006468	protein phosphorylation	19_GO:0008152 metabolic process	-3	-0.83	ADNI
GO:0007169	transmembrane receptor protein tyrosine kinase signaling pathway	19_GO:0023052 signaling	-3	-0.82	ADNI
GO:0030100	regulation of endocytosis	19_GO:0051179 localization	-3	-0.82	ADNI
GO:0035335	peptidyl-tyrosine dephosphorylation	19_GO:0008152 metabolic process	-2.9	-0.81	ADNI
GO:0071417	cellular response to organonitrogen compound	19_GO:0050896 response to stimulus	-2.8	-0.74	ADNI
GO:0007190	activation of adenylate cyclase activity	19_GO:0065007 biological regulation	-2.8	-0.74	ADNI
GO:0048259	regulation of receptor-mediated endocytosis	19_GO:0051179 localization	-2.8	-0.74	ADNI
GO:0061157	mRNA destabilization	19_GO:0048519 negative regulation of biological process	-2.8	-0.7	ADNI
GO:0051385	response to mineralocorticoid	19_GO:0050896 response to stimulus	-2.7	-0.7	ADNI
GO:0071375	cellular response to peptide hormone stimulus	19_GO:0050896 response to stimulus	-2.7	-0.69	ADNI
GO:0031670	cellular response to nutrient	19_GO:0050896 response to stimulus	-2.7	-0.68	ADNI
GO:0033238	regulation of cellular amine metabolic process	19_GO:0008152 metabolic process	-2.7	-0.68	ADNI
GO:0006816	calcium ion transport	19_GO:0051179 localization	-2.7	-0.68	ADNI
GO:0050779	RNA destabilization	19_GO:0048518 positive regulation of biological process	-2.7	-0.68	ADNI
GO:0051046	regulation of secretion	19_GO:0051179 localization	-2.6	-0.66	ADNI
GO:0009119	ribonucleoside metabolic process	19_GO:0008152 metabolic process	-2.6	-0.66	ADNI
GO:0070588	calcium ion transmembrane transport	19_GO:0051179 localization	-2.6	-0.66	ADNI
GO:0045823	positive regulation of heart contraction	19_GO:0048518 positive regulation of biological process	-2.5	-0.6	ADNI
GO:2000249	regulation of actin cytoskeleton reorganization	19_GO:0050789 regulation of biological process	-2.5	-0.6	ADNI
GO:1901699	cellular response to nitrogen compound	19_GO:0050896 response to stimulus	-2.5	-0.59	ADNI
GO:1903524	positive regulation of blood circulation	19_GO:0048518 positive regulation of biological process	-2.5	-0.58	ADNI
GO:1903522	regulation of blood circulation	19_GO:0032501 multicellular organismal process	-2.5	-0.58	ADNI
GO:0009410	response to xenobiotic stimulus	19_GO:0050896 response to stimulus	-2.4	-0.57	ADNI
GO:0071277	cellular response to calcium ion	19_GO:0050896 response to stimulus	-2.4	-0.56	ADNI
GO:0061014	positive regulation of mRNA catabolic process	19_GO:0048519 negative regulation of biological process	-2.4	-0.56	ADNI
GO:0043393	regulation of protein binding	19_GO:0065007 biological regulation	-2.4	-0.56	ADNI
GO:0007610	behavior	19_GO:0007610 behavior	-2.4	-0.56	ADNI
GO:0009167	purine ribonucleoside monophosphate metabolic process	19_GO:0008152 metabolic process	-2.4	-0.56	ADNI
GO:0046903	secretion	19_GO:0051179 localization	-2.4	-0.55	ADNI
GO:0014075	response to amine	19_GO:0050896 response to stimulus	-2.4	-0.54	ADNI
GO:1903305	regulation of regulated secretory pathway	19_GO:0051179 localization	-2.4	-0.53	ADNI
GO:0009725	response to hormone	19_GO:0050896 response to stimulus	-2.4	-0.53	ADNI
GO:0009126	purine nucleoside monophosphate metabolic process	19_GO:0008152 metabolic process	-2.3	-0.53	ADNI
GO:0060976	coronary vasculature development	19_GO:0032502 developmental process	-2.3	-0.51	ADNI
GO:0032868	response to insulin	19_GO:0050896 response to stimulus	-2.3	-0.5	ADNI
GO:0044283	small molecule biosynthetic process	19_GO:0008152 metabolic process	-2.3	-0.5	ADNI
GO:0140352	export from cell	19_GO:0051179 localization	-2.3	-0.5	ADNI
GO:0006470	protein dephosphorylation	19_GO:0008152 metabolic process	-2.3	-0.5	ADNI
GO:0050886	endocrine process	19_GO:0032501 multicellular organismal process	-2.2	-0.46	ADNI
GO:0032091	negative regulation of protein binding	19_GO:0065007 biological regulation	-2.2	-0.46	ADNI
GO:0043408	regulation of MAPK cascade	19_GO:0023052 signaling	-2.2	-0.46	ADNI
GO:0034599	cellular response to oxidative stress	19_GO:0050896 response to stimulus	-2.2	-0.45	ADNI
GO:0051960	regulation of nervous system development	19_GO:0032502 developmental process	-2.2	-0.45	ADNI
GO:0032692	negative regulation of interleukin-1 production	19_GO:0048519 negative regulation of biological process	-2.2	-0.43	ADNI
GO:0006979	response to oxidative stress	19_GO:0050896 response to stimulus	-2.2	-0.43	ADNI
GO:0051098	regulation of binding	19_GO:0065007 biological regulation	-2.2	-0.43	ADNI
GO:1990542	mitochondrial transmembrane transport	19_GO:0051179 localization	-2.2	-0.43	ADNI
GO:0006887	exocytosis	19_GO:0051179 localization	-2.1	-0.43	ADNI
GO:0032940	secretion by cell	19_GO:0051179 localization	-2.1	-0.42	ADNI
GO:1901653	cellular response to peptide	19_GO:0050896 response to stimulus	-2.1	-0.41	ADNI
GO:0061098	positive regulation of protein tyrosine kinase activity	19_GO:0048518 positive regulation of biological process	-2.1	-0.4	ADNI
GO:0051100	negative regulation of binding	19_GO:0065007 biological regulation	-2.1	-0.4	ADNI
GO:0060291	long-term synaptic potentiation	19_GO:0023052 signaling	-2.1	-0.39	ADNI
GO:1903530	regulation of secretion by cell	19_GO:0051179 localization	-2	-0.38	ADNI
GO:0016311	dephosphorylation	19_GO:0008152 metabolic process	-2	-0.38	ADNI
GO:0098660	inorganic ion transmembrane transport	19_GO:0051179 localization	-2	-0.38	ADNI
GO:0006081	cellular aldehyde metabolic process	19_GO:0008152 metabolic process	-2	-0.38	ADNI
GO:0002090	regulation of receptor internalization	19_GO:0051179 localization	-2	-0.38	ADNI
GO:0098655	cation transmembrane transport	19_GO:0051179 localization	-2	-0.37	ADNI
GO:0000302	response to reactive oxygen species	19_GO:0050896 response to stimulus	-2	-0.37	ADNI
GO:0009161	ribonucleoside monophosphate metabolic process	19_GO:0008152 metabolic process	-2	-0.37	ADNI
GO:1903313	positive regulation of mRNA metabolic process	19_GO:0048518 positive regulation of biological process	-2	-0.34	ADNI
GO:0008015	blood circulation	19_GO:0032501 multicellular organismal process	-1.9	-0.33	ADNI
GO:0006814	sodium ion transport	19_GO:0051179 localization	-1.9	-0.33	ADNI
GO:0098662	inorganic cation transmembrane transport	19_GO:0051179 localization	-1.9	-0.33	ADNI
GO:0034614	cellular response to reactive oxygen species	19_GO:0050896 response to stimulus	-1.9	-0.32	ADNI
GO:0009116	nucleoside metabolic process	19_GO:0008152 metabolic process	-1.9	-0.32	ADNI
GO:0044057	regulation of system process	19_GO:0032501 multicellular organismal process	-1.9	-0.32	ADNI
GO:0043410	positive regulation of MAPK cascade	19_GO:0023052 signaling	-1.9	-0.32	ADNI
GO:0019229	regulation of vasoconstriction	19_GO:0032501 multicellular organismal process	-1.9	-0.32	ADNI
GO:0048814	regulation of dendrite morphogenesis	19_GO:0032502 developmental process	-1.9	-0.32	ADNI
GO:0070988	demethylation	19_GO:0008152 metabolic process	-1.9	-0.29	ADNI
GO:0030193	regulation of blood coagulation	19_GO:0032501 multicellular organismal process	-1.9	-0.29	ADNI
GO:0046777	protein autophosphorylation	19_GO:0008152 metabolic process	-1.9	-0.29	ADNI
GO:0062197	cellular response to chemical stress	19_GO:0050896 response to stimulus	-1.8	-0.28	ADNI
GO:0007187	G protein-coupled receptor signaling pathway, coupled to cyclic nucleotide second messenger	19_GO:0023052 signaling	-1.8	-0.28	ADNI
GO:1900046	regulation of hemostasis	19_GO:0050789 regulation of biological process	-1.8	-0.27	ADNI
GO:0071407	cellular response to organic cyclic compound	19_GO:0050896 response to stimulus	-1.8	-0.27	ADNI
GO:0071248	cellular response to metal ion	19_GO:0050896 response to stimulus	-1.8	-0.27	ADNI
GO:0003018	vascular process in circulatory system	19_GO:0032501 multicellular organismal process	-1.8	-0.27	ADNI
GO:0007611	learning or memory	19_GO:0007610 behavior	-1.8	-0.26	ADNI
GO:0048511	rhythmic process	19_GO:0048511 rhythmic process	-1.8	-0.25	ADNI
GO:0007167	enzyme linked receptor protein signaling pathway	19_GO:0023052 signaling	-1.8	-0.24	ADNI
GO:0050818	regulation of coagulation	19_GO:0032501 multicellular organismal process	-1.8	-0.24	ADNI
GO:0010942	positive regulation of cell death	19_GO:0048518 positive regulation of biological process	-1.8	-0.23	ADNI
GO:0048167	regulation of synaptic plasticity	19_GO:0023052 signaling	-1.8	-0.23	ADNI
GO:0010876	lipid localization	19_GO:0051179 localization	-1.8	-0.23	ADNI
GO:0001666	response to hypoxia	19_GO:0050896 response to stimulus	-1.7	-0.22	ADNI
GO:0009612	response to mechanical stimulus	19_GO:0050896 response to stimulus	-1.7	-0.21	ADNI
GO:0019233	sensory perception of pain	19_GO:0032501 multicellular organismal process	-1.7	-0.21	ADNI
GO:0034097	response to cytokine	19_GO:0050896 response to stimulus	-1.7	-0.21	ADNI
GO:0014074	response to purine-containing compound	19_GO:0050896 response to stimulus	-1.7	-0.21	ADNI
GO:0017157	regulation of exocytosis	19_GO:0051179 localization	-1.7	-0.2	ADNI
GO:0043065	positive regulation of apoptotic process	19_GO:0048518 positive regulation of biological process	-1.7	-0.2	ADNI
GO:0008277	regulation of G protein-coupled receptor signaling pathway	19_GO:0023052 signaling	-1.7	-0.19	ADNI
GO:0008016	regulation of heart contraction	19_GO:0032501 multicellular organismal process	-1.7	-0.18	ADNI
GO:0050905	neuromuscular process	19_GO:0032501 multicellular organismal process	-1.7	-0.18	ADNI
GO:0009123	nucleoside monophosphate metabolic process	19_GO:0008152 metabolic process	-1.7	-0.17	ADNI
GO:0015931	nucleobase-containing compound transport	19_GO:0051179 localization	-1.7	-0.17	ADNI
GO:0036293	response to decreased oxygen levels	19_GO:0050896 response to stimulus	-1.7	-0.16	ADNI
GO:0035296	regulation of tube diameter	19_GO:0065007 biological regulation	-1.7	-0.16	ADNI
GO:0097746	blood vessel diameter maintenance	19_GO:0032501 multicellular organismal process	-1.7	-0.16	ADNI
GO:0007507	heart development	19_GO:0032502 developmental process	-1.6	-0.16	ADNI
GO:0043068	positive regulation of programmed cell death	19_GO:0048518 positive regulation of biological process	-1.6	-0.16	ADNI
GO:0035150	regulation of tube size	19_GO:0065007 biological regulation	-1.6	-0.16	ADNI
GO:0007584	response to nutrient	19_GO:0050896 response to stimulus	-1.6	-0.16	ADNI
GO:0008643	carbohydrate transport	19_GO:0051179 localization	-1.6	-0.16	ADNI
GO:0019932	second-messenger-mediated signaling	19_GO:0023052 signaling	-1.6	-0.16	ADNI
GO:0051592	response to calcium ion	19_GO:0050896 response to stimulus	-1.6	-0.15	ADNI
GO:0035050	embryonic heart tube development	19_GO:0032502 developmental process	-1.6	-0.14	ADNI
GO:0070374	positive regulation of ERK1 and ERK2 cascade	19_GO:0023052 signaling	-1.6	-0.12	ADNI
GO:0071241	cellular response to inorganic substance	19_GO:0050896 response to stimulus	-1.6	-0.12	ADNI
GO:1904064	positive regulation of cation transmembrane transport	19_GO:0051179 localization	-1.6	-0.12	ADNI
GO:0032869	cellular response to insulin stimulus	19_GO:0050896 response to stimulus	-1.6	-0.12	ADNI
GO:0032870	cellular response to hormone stimulus	19_GO:0050896 response to stimulus	-1.6	-0.11	ADNI
GO:0046928	regulation of neurotransmitter secretion	19_GO:0023052 signaling	-1.6	-0.11	ADNI
GO:0009416	response to light stimulus	19_GO:0050896 response to stimulus	-1.5	-0.1	ADNI
GO:0050890	cognition	19_GO:0032501 multicellular organismal process	-1.5	-0.094	ADNI
GO:0006886	intracellular protein transport	19_GO:0051179 localization	-1.5	-0.093	ADNI
GO:0043488	regulation of mRNA stability	19_GO:0048519 negative regulation of biological process	-1.5	-0.092	ADNI
GO:0051591	response to cAMP	19_GO:0050896 response to stimulus	-1.5	-0.089	ADNI
GO:1901657	glycosyl compound metabolic process	19_GO:0008152 metabolic process	-1.5	-0.089	ADNI
GO:0015850	organic hydroxy compound transport	19_GO:0051179 localization	-1.5	-0.086	ADNI
GO:0070482	response to oxygen levels	19_GO:0050896 response to stimulus	-1.5	-0.086	ADNI
GO:0061097	regulation of protein tyrosine kinase activity	19_GO:0008152 metabolic process	-1.5	-0.083	ADNI
GO:0007631	feeding behavior	19_GO:0007610 behavior	-1.5	-0.083	ADNI
GO:0043549	regulation of kinase activity	19_GO:0008152 metabolic process	-1.5	-0.082	ADNI
GO:0070372	regulation of ERK1 and ERK2 cascade	19_GO:0023052 signaling	-1.5	-0.079	ADNI
GO:0051952	regulation of amine transport	19_GO:0051179 localization	-1.5	-0.067	ADNI
GO:0006869	lipid transport	19_GO:0051179 localization	-1.5	-0.063	ADNI
GO:0006897	endocytosis	19_GO:0051179 localization	-1.5	-0.063	ADNI
GO:0003013	circulatory system process	19_GO:0032501 multicellular organismal process	-1.5	-0.054	ADNI
GO:0034767	positive regulation of ion transmembrane transport	19_GO:0051179 localization	-1.5	-0.042	ADNI
GO:0001525	angiogenesis	19_GO:0032502 developmental process	-1.4	-0.041	ADNI
GO:0017148	negative regulation of translation	19_GO:0048519 negative regulation of biological process	-1.4	-0.038	ADNI
GO:0071396	cellular response to lipid	19_GO:0050896 response to stimulus	-1.4	-0.034	ADNI
GO:0071870	cellular response to catecholamine stimulus	19_GO:0050896 response to stimulus	-1.4	-0.031	ADNI
GO:0071868	cellular response to monoamine stimulus	19_GO:0050896 response to stimulus	-1.4	-0.031	ADNI
GO:0043487	regulation of RNA stability	19_GO:0008152 metabolic process	-1.4	-0.031	ADNI
GO:0001568	blood vessel development	19_GO:0032502 developmental process	-1.4	-0.028	ADNI
GO:0051048	negative regulation of secretion	19_GO:0051179 localization	-1.4	-0.028	ADNI
GO:0050773	regulation of dendrite development	19_GO:0032502 developmental process	-1.4	-0.028	ADNI
GO:0071466	cellular response to xenobiotic stimulus	19_GO:0050896 response to stimulus	-1.4	-0.027	ADNI
GO:0051588	regulation of neurotransmitter transport	19_GO:0051179 localization	-1.4	-0.026	ADNI
GO:0071869	response to catecholamine	19_GO:0050896 response to stimulus	-1.4	-0.019	ADNI
GO:0071867	response to monoamine	19_GO:0050896 response to stimulus	-1.4	-0.019	ADNI
GO:0061013	regulation of mRNA catabolic process	19_GO:0048519 negative regulation of biological process	-1.4	-0.0081	ADNI
GO:0062014	negative regulation of small molecule metabolic process	19_GO:0048519 negative regulation of biological process	-1.4	-0.0052	ADNI
GO:0030001	metal ion transport	19_GO:0051179 localization	-1.4	0	ADNI
GO:0050804	modulation of chemical synaptic transmission	19_GO:0023052 signaling	-1.4	0	ADNI
GO:0099177	regulation of trans-synaptic signaling	19_GO:0023052 signaling	-1.3	0	ADNI
GO:0050954	sensory perception of mechanical stimulus	19_GO:0032501 multicellular organismal process	-1.3	0	ADNI
GO:0042542	response to hydrogen peroxide	19_GO:0050896 response to stimulus	-1.3	0	ADNI
GO:0044782	cilium organization	19_GO:0009987 cellular process	-1.3	0	ADNI
GO:0001944	vasculature development	19_GO:0032502 developmental process	-1.3	0	ADNI
GO:0008361	regulation of cell size	19_GO:0065007 biological regulation	-1.3	0	ADNI
GO:0042692	muscle cell differentiation	19_GO:0032502 developmental process	-1.3	0	ADNI
GO:0046394	carboxylic acid biosynthetic process	19_GO:0008152 metabolic process	-1.3	0	ADNI
GO:0003015	heart process	19_GO:0032501 multicellular organismal process	-1.3	0	ADNI
GO:0016053	organic acid biosynthetic process	19_GO:0008152 metabolic process	-1.3	0	ADNI
GO:0000956	nuclear-transcribed mRNA catabolic process	19_GO:0048519 negative regulation of biological process	-8.8	-4.6	ANM1
GO:0034248	regulation of cellular amide metabolic process	19_GO:0008152 metabolic process	-8.4	-4.5	ANM1
GO:0006417	regulation of translation	19_GO:0008152 metabolic process	-8.1	-4.4	ANM1
GO:0006402	mRNA catabolic process	19_GO:0048519 negative regulation of biological process	-8	-4.4	ANM1
GO:0016071	mRNA metabolic process	19_GO:0008152 metabolic process	-7.7	-4.2	ANM1
GO:0006401	RNA catabolic process	19_GO:0008152 metabolic process	-7.1	-3.7	ANM1
GO:0034655	nucleobase-containing compound catabolic process	19_GO:0008152 metabolic process	-5.3	-2	ANM1
GO:0034660	ncRNA metabolic process	19_GO:0008152 metabolic process	-5.3	-2	ANM1
GO:0034470	ncRNA processing	19_GO:0008152 metabolic process	-5.1	-1.9	ANM1
GO:0000288	nuclear-transcribed mRNA catabolic process, deadenylation-dependent decay	19_GO:0048519 negative regulation of biological process	-5	-1.8	ANM1
GO:0046700	heterocycle catabolic process	19_GO:0008152 metabolic process	-4.9	-1.8	ANM1
GO:0044270	cellular nitrogen compound catabolic process	19_GO:0008152 metabolic process	-4.8	-1.7	ANM1
GO:0019439	aromatic compound catabolic process	19_GO:0008152 metabolic process	-4.7	-1.7	ANM1
GO:0022613	ribonucleoprotein complex biogenesis	19_GO:0009987 cellular process	-4.6	-1.7	ANM1
GO:1901361	organic cyclic compound catabolic process	19_GO:0008152 metabolic process	-4.4	-1.5	ANM1
GO:0046686	response to cadmium ion	19_GO:0050896 response to stimulus	-4.3	-1.4	ANM1
GO:0042254	ribosome biogenesis	19_GO:0009987 cellular process	-4.1	-1.3	ANM1
GO:0061157	mRNA destabilization	19_GO:0048519 negative regulation of biological process	-4	-1.3	ANM1
GO:0050779	RNA destabilization	19_GO:0048518 positive regulation of biological process	-3.9	-1.2	ANM1
GO:0016072	rRNA metabolic process	19_GO:0008152 metabolic process	-3.8	-1.1	ANM1
GO:0034394	protein localization to cell surface	19_GO:0051179 localization	-3.7	-1.1	ANM1
GO:0050863	regulation of T cell activation	19_GO:0002376 immune system process	-3.7	-1.1	ANM1
GO:0061014	positive regulation of mRNA catabolic process	19_GO:0048519 negative regulation of biological process	-3.7	-1.1	ANM1
GO:0090305	nucleic acid phosphodiester bond hydrolysis	19_GO:0008152 metabolic process	-3.6	-1	ANM1
GO:0071276	cellular response to cadmium ion	19_GO:0050896 response to stimulus	-3.5	-1	ANM1
GO:0010638	positive regulation of organelle organization	19_GO:0048518 positive regulation of biological process	-3.5	-1	ANM1
GO:0000302	response to reactive oxygen species	19_GO:0050896 response to stimulus	-3.5	-0.99	ANM1
GO:0010817	regulation of hormone levels	19_GO:0065007 biological regulation	-3.5	-0.99	ANM1
GO:0061013	regulation of mRNA catabolic process	19_GO:0048519 negative regulation of biological process	-3.5	-0.99	ANM1
GO:0002694	regulation of leukocyte activation	19_GO:0002376 immune system process	-3.5	-0.99	ANM1
GO:0001775	cell activation	19_GO:0009987 cellular process	-3.4	-0.99	ANM1
GO:0008380	RNA splicing	19_GO:0008152 metabolic process	-3.4	-0.99	ANM1
GO:0007548	sex differentiation	19_GO:0022414 reproductive process	-3.4	-0.99	ANM1
GO:0006399	tRNA metabolic process	19_GO:0008152 metabolic process	-3.4	-0.99	ANM1
GO:0090503	RNA phosphodiester bond hydrolysis, exonucleolytic	19_GO:0008152 metabolic process	-3.4	-0.96	ANM1
GO:0045321	leukocyte activation	19_GO:0002376 immune system process	-3.4	-0.96	ANM1
GO:0051249	regulation of lymphocyte activation	19_GO:0002376 immune system process	-3.3	-0.91	ANM1
GO:0046649	lymphocyte activation	19_GO:0002376 immune system process	-3.3	-0.91	ANM1
GO:0050865	regulation of cell activation	19_GO:0050789 regulation of biological process	-3.2	-0.89	ANM1
GO:0042445	hormone metabolic process	19_GO:0008152 metabolic process	-3.2	-0.88	ANM1
GO:0048608	reproductive structure development	19_GO:0022414 reproductive process	-3.2	-0.88	ANM1
GO:0002696	positive regulation of leukocyte activation	19_GO:0002376 immune system process	-3.2	-0.88	ANM1
GO:0061458	reproductive system development	19_GO:0032502 developmental process	-3.2	-0.88	ANM1
GO:1903313	positive regulation of mRNA metabolic process	19_GO:0048518 positive regulation of biological process	-3.2	-0.88	ANM1
GO:0048013	ephrin receptor signaling pathway	19_GO:0023052 signaling	-3.2	-0.87	ANM1
GO:0034614	cellular response to reactive oxygen species	19_GO:0050896 response to stimulus	-3.1	-0.87	ANM1
GO:0050867	positive regulation of cell activation	19_GO:0048518 positive regulation of biological process	-3.1	-0.87	ANM1
GO:0001541	ovarian follicle development	19_GO:0022414 reproductive process	-3.1	-0.87	ANM1
GO:0008033	tRNA processing	19_GO:0008152 metabolic process	-3	-0.83	ANM1
GO:0008406	gonad development	19_GO:0022414 reproductive process	-3	-0.83	ANM1
GO:0006364	rRNA processing	19_GO:0008152 metabolic process	-3	-0.83	ANM1
GO:0045931	positive regulation of mitotic cell cycle	19_GO:0048518 positive regulation of biological process	-3	-0.82	ANM1
GO:0006790	sulfur compound metabolic process	19_GO:0008152 metabolic process	-3	-0.82	ANM1
GO:0045137	development of primary sexual characteristics	19_GO:0022414 reproductive process	-3	-0.82	ANM1
GO:0006397	mRNA processing	19_GO:0008152 metabolic process	-3	-0.82	ANM1
GO:0001649	osteoblast differentiation	19_GO:0032502 developmental process	-2.9	-0.81	ANM1
GO:0043603	cellular amide metabolic process	19_GO:0008152 metabolic process	-2.9	-0.81	ANM1
GO:2001244	positive regulation of intrinsic apoptotic signaling pathway	19_GO:0023052 signaling	-2.9	-0.79	ANM1
GO:0048872	homeostasis of number of cells	19_GO:0065007 biological regulation	-2.9	-0.76	ANM1
GO:0045727	positive regulation of translation	19_GO:0048518 positive regulation of biological process	-2.8	-0.74	ANM1
GO:0006979	response to oxidative stress	19_GO:0050896 response to stimulus	-2.8	-0.71	ANM1
GO:0031347	regulation of defense response	19_GO:0050896 response to stimulus	-2.7	-0.7	ANM1
GO:0042110	T cell activation	19_GO:0002376 immune system process	-2.7	-0.69	ANM1
GO:0050658	RNA transport	19_GO:0051179 localization	-2.7	-0.69	ANM1
GO:0050657	nucleic acid transport	19_GO:0051179 localization	-2.7	-0.69	ANM1
GO:0043488	regulation of mRNA stability	19_GO:0048519 negative regulation of biological process	-2.7	-0.68	ANM1
GO:0010035	response to inorganic substance	19_GO:0050896 response to stimulus	-2.7	-0.68	ANM1
GO:0051236	establishment of RNA localization	19_GO:0051179 localization	-2.7	-0.68	ANM1
GO:0001776	leukocyte homeostasis	19_GO:0002376 immune system process	-2.7	-0.68	ANM1
GO:0097435	supramolecular fiber organization	19_GO:0009987 cellular process	-2.7	-0.68	ANM1
GO:0000377	RNA splicing, via transesterification reactions with bulged adenosine as nucleophile	19_GO:0008152 metabolic process	-2.7	-0.68	ANM1
GO:0000398	mRNA splicing, via spliceosome	19_GO:0008152 metabolic process	-2.7	-0.68	ANM1
GO:0034249	negative regulation of cellular amide metabolic process	19_GO:0048519 negative regulation of biological process	-2.6	-0.66	ANM1
GO:0000375	RNA splicing, via transesterification reactions	19_GO:0008152 metabolic process	-2.6	-0.66	ANM1
GO:0043065	positive regulation of apoptotic process	19_GO:0048518 positive regulation of biological process	-2.6	-0.66	ANM1
GO:0006919	activation of cysteine-type endopeptidase activity involved in apoptotic process	19_GO:0048518 positive regulation of biological process	-2.6	-0.66	ANM1
GO:0050727	regulation of inflammatory response	19_GO:0050896 response to stimulus	-2.6	-0.66	ANM1
GO:0001503	ossification	19_GO:0032501 multicellular organismal process	-2.6	-0.66	ANM1
GO:0043487	regulation of RNA stability	19_GO:0008152 metabolic process	-2.6	-0.65	ANM1
GO:0009451	RNA modification	19_GO:0008152 metabolic process	-2.6	-0.65	ANM1
GO:0034250	positive regulation of cellular amide metabolic process	19_GO:0048518 positive regulation of biological process	-2.6	-0.64	ANM1
GO:0043068	positive regulation of programmed cell death	19_GO:0048518 positive regulation of biological process	-2.6	-0.64	ANM1
GO:0006446	regulation of translational initiation	19_GO:0008152 metabolic process	-2.6	-0.64	ANM1
GO:2001242	regulation of intrinsic apoptotic signaling pathway	19_GO:0023052 signaling	-2.5	-0.62	ANM1
GO:1901987	regulation of cell cycle phase transition	19_GO:0050789 regulation of biological process	-2.5	-0.6	ANM1
GO:0006403	RNA localization	19_GO:0051179 localization	-2.5	-0.59	ANM1
GO:0002366	leukocyte activation involved in immune response	19_GO:0002376 immune system process	-2.5	-0.58	ANM1
GO:0032508	DNA duplex unwinding	19_GO:0009987 cellular process	-2.5	-0.58	ANM1
GO:1903311	regulation of mRNA metabolic process	19_GO:0008152 metabolic process	-2.5	-0.58	ANM1
GO:0035383	thioester metabolic process	19_GO:0008152 metabolic process	-2.5	-0.58	ANM1
GO:0006637	acyl-CoA metabolic process	19_GO:0008152 metabolic process	-2.5	-0.58	ANM1
GO:0002263	cell activation involved in immune response	19_GO:0002376 immune system process	-2.4	-0.57	ANM1
GO:0032392	DNA geometric change	19_GO:0009987 cellular process	-2.4	-0.54	ANM1
GO:0031331	positive regulation of cellular catabolic process	19_GO:0048518 positive regulation of biological process	-2.4	-0.54	ANM1
GO:0071248	cellular response to metal ion	19_GO:0050896 response to stimulus	-2.4	-0.53	ANM1
GO:0034308	primary alcohol metabolic process	19_GO:0008152 metabolic process	-2.4	-0.53	ANM1
GO:0140694	non-membrane-bounded organelle assembly	19_GO:0009987 cellular process	-2.4	-0.53	ANM1
GO:0008585	female gonad development	19_GO:0022414 reproductive process	-2.3	-0.53	ANM1
GO:0006721	terpenoid metabolic process	19_GO:0008152 metabolic process	-2.3	-0.52	ANM1
GO:0010942	positive regulation of cell death	19_GO:0048518 positive regulation of biological process	-2.3	-0.5	ANM1
GO:1901992	positive regulation of mitotic cell cycle phase transition	19_GO:0048518 positive regulation of biological process	-2.3	-0.5	ANM1
GO:0046545	development of primary female sexual characteristics	19_GO:0022414 reproductive process	-2.3	-0.5	ANM1
GO:1901990	regulation of mitotic cell cycle phase transition	19_GO:0050789 regulation of biological process	-2.3	-0.5	ANM1
GO:0035335	peptidyl-tyrosine dephosphorylation	19_GO:0008152 metabolic process	-2.3	-0.48	ANM1
GO:0043281	regulation of cysteine-type endopeptidase activity involved in apoptotic process	19_GO:0008152 metabolic process	-2.3	-0.48	ANM1
GO:0006457	protein folding	19_GO:0009987 cellular process	-2.3	-0.48	ANM1
GO:0043523	regulation of neuron apoptotic process	19_GO:0050789 regulation of biological process	-2.2	-0.47	ANM1
GO:0006470	protein dephosphorylation	19_GO:0008152 metabolic process	-2.2	-0.46	ANM1
GO:0042542	response to hydrogen peroxide	19_GO:0050896 response to stimulus	-2.2	-0.46	ANM1
GO:0015931	nucleobase-containing compound transport	19_GO:0051179 localization	-2.2	-0.46	ANM1
GO:0001819	positive regulation of cytokine production	19_GO:0048518 positive regulation of biological process	-2.2	-0.46	ANM1
GO:0007346	regulation of mitotic cell cycle	19_GO:0050789 regulation of biological process	-2.2	-0.46	ANM1
GO:0001824	blastocyst development	19_GO:0032502 developmental process	-2.2	-0.46	ANM1
GO:1903037	regulation of leukocyte cell-cell adhesion	19_GO:0022610 biological adhesion	-2.2	-0.43	ANM1
GO:0034599	cellular response to oxidative stress	19_GO:0050896 response to stimulus	-2.2	-0.43	ANM1
GO:0071241	cellular response to inorganic substance	19_GO:0050896 response to stimulus	-2.1	-0.43	ANM1
GO:0046660	female sex differentiation	19_GO:0022414 reproductive process	-2.1	-0.42	ANM1
GO:0006720	isoprenoid metabolic process	19_GO:0008152 metabolic process	-2.1	-0.42	ANM1
GO:0010038	response to metal ion	19_GO:0050896 response to stimulus	-2.1	-0.42	ANM1
GO:0050870	positive regulation of T cell activation	19_GO:0022610 biological adhesion	-2.1	-0.42	ANM1
GO:0009896	positive regulation of catabolic process	19_GO:0048518 positive regulation of biological process	-2.1	-0.41	ANM1
GO:2000116	regulation of cysteine-type endopeptidase activity	19_GO:0008152 metabolic process	-2.1	-0.4	ANM1
GO:0050670	regulation of lymphocyte proliferation	19_GO:0002376 immune system process	-2.1	-0.4	ANM1
GO:0002262	myeloid cell homeostasis	19_GO:0002376 immune system process	-2.1	-0.4	ANM1
GO:0033875	ribonucleoside bisphosphate metabolic process	19_GO:0008152 metabolic process	-2.1	-0.4	ANM1
GO:0033865	nucleoside bisphosphate metabolic process	19_GO:0008152 metabolic process	-2.1	-0.4	ANM1
GO:0034032	purine nucleoside bisphosphate metabolic process	19_GO:0008152 metabolic process	-2.1	-0.4	ANM1
GO:0046883	regulation of hormone secretion	19_GO:0023052 signaling	-2.1	-0.4	ANM1
GO:0032944	regulation of mononuclear cell proliferation	19_GO:0050789 regulation of biological process	-2.1	-0.39	ANM1
GO:0046887	positive regulation of hormone secretion	19_GO:0023052 signaling	-2.1	-0.39	ANM1
GO:1901989	positive regulation of cell cycle phase transition	19_GO:0048518 positive regulation of biological process	-2.1	-0.38	ANM1
GO:0048589	developmental growth	19_GO:0040007 growth	-2	-0.38	ANM1
GO:0040007	growth	19_GO:0040007 growth	-2	-0.38	ANM1
GO:0051251	positive regulation of lymphocyte activation	19_GO:0002376 immune system process	-2	-0.38	ANM1
GO:0043280	positive regulation of cysteine-type endopeptidase activity involved in apoptotic process	19_GO:0048518 positive regulation of biological process	-2	-0.38	ANM1
GO:0034754	cellular hormone metabolic process	19_GO:0008152 metabolic process	-2	-0.38	ANM1
GO:0017148	negative regulation of translation	19_GO:0048519 negative regulation of biological process	-2	-0.38	ANM1
GO:1903039	positive regulation of leukocyte cell-cell adhesion	19_GO:0022610 biological adhesion	-2	-0.36	ANM1
GO:0002699	positive regulation of immune effector process	19_GO:0002376 immune system process	-2	-0.35	ANM1
GO:0051604	protein maturation	19_GO:0008152 metabolic process	-2	-0.34	ANM1
GO:2001235	positive regulation of apoptotic signaling pathway	19_GO:0023052 signaling	-2	-0.34	ANM1
GO:0008584	male gonad development	19_GO:0022414 reproductive process	-1.9	-0.33	ANM1
GO:0070663	regulation of leukocyte proliferation	19_GO:0050789 regulation of biological process	-1.9	-0.33	ANM1
GO:0002274	myeloid leukocyte activation	19_GO:0002376 immune system process	-1.9	-0.33	ANM1
GO:0046546	development of primary male sexual characteristics	19_GO:0022414 reproductive process	-1.9	-0.33	ANM1
GO:0062197	cellular response to chemical stress	19_GO:0050896 response to stimulus	-1.9	-0.32	ANM1
GO:1903322	positive regulation of protein modification by small protein conjugation or removal	19_GO:0048518 positive regulation of biological process	-1.9	-0.32	ANM1
GO:0044272	sulfur compound biosynthetic process	19_GO:0008152 metabolic process	-1.9	-0.32	ANM1
GO:0050671	positive regulation of lymphocyte proliferation	19_GO:0002376 immune system process	-1.9	-0.31	ANM1
GO:0071383	cellular response to steroid hormone stimulus	19_GO:0050896 response to stimulus	-1.9	-0.31	ANM1
GO:2001056	positive regulation of cysteine-type endopeptidase activity	19_GO:0048518 positive regulation of biological process	-1.9	-0.3	ANM1
GO:0032946	positive regulation of mononuclear cell proliferation	19_GO:0048518 positive regulation of biological process	-1.9	-0.3	ANM1
GO:0030162	regulation of proteolysis	19_GO:0008152 metabolic process	-1.8	-0.28	ANM1
GO:0045580	regulation of T cell differentiation	19_GO:0002376 immune system process	-1.8	-0.26	ANM1
GO:0009060	aerobic respiration	19_GO:0008152 metabolic process	-1.8	-0.26	ANM1
GO:0090501	RNA phosphodiester bond hydrolysis	19_GO:0008152 metabolic process	-1.8	-0.26	ANM1
GO:0052548	regulation of endopeptidase activity	19_GO:0008152 metabolic process	-1.8	-0.25	ANM1
GO:0009913	epidermal cell differentiation	19_GO:0032502 developmental process	-1.8	-0.23	ANM1
GO:0070665	positive regulation of leukocyte proliferation	19_GO:0048518 positive regulation of biological process	-1.8	-0.23	ANM1
GO:0046661	male sex differentiation	19_GO:0022414 reproductive process	-1.8	-0.23	ANM1
GO:0022409	positive regulation of cell-cell adhesion	19_GO:0022610 biological adhesion	-1.7	-0.21	ANM1
GO:0060341	regulation of cellular localization	19_GO:0051179 localization	-1.7	-0.2	ANM1
GO:0042113	B cell activation	19_GO:0002376 immune system process	-1.7	-0.19	ANM1
GO:0022407	regulation of cell-cell adhesion	19_GO:0022610 biological adhesion	-1.7	-0.18	ANM1
GO:0052547	regulation of peptidase activity	19_GO:0008152 metabolic process	-1.7	-0.18	ANM1
GO:0016311	dephosphorylation	19_GO:0008152 metabolic process	-1.7	-0.16	ANM1
GO:0042129	regulation of T cell proliferation	19_GO:0002376 immune system process	-1.7	-0.16	ANM1
GO:0010950	positive regulation of endopeptidase activity	19_GO:0048518 positive regulation of biological process	-1.7	-0.16	ANM1
GO:0010634	positive regulation of epithelial cell migration	19_GO:0040011 locomotion	-1.7	-0.16	ANM1
GO:0046890	regulation of lipid biosynthetic process	19_GO:0008152 metabolic process	-1.6	-0.16	ANM1
GO:1901214	regulation of neuron death	19_GO:0050789 regulation of biological process	-1.6	-0.16	ANM1
GO:0032870	cellular response to hormone stimulus	19_GO:0050896 response to stimulus	-1.6	-0.16	ANM1
GO:0071103	DNA conformation change	19_GO:0009987 cellular process	-1.6	-0.16	ANM1
GO:0006066	alcohol metabolic process	19_GO:0008152 metabolic process	-1.6	-0.15	ANM1
GO:0048534	hematopoietic or lymphoid organ development	19_GO:0002376 immune system process	-1.6	-0.15	ANM1
GO:0045333	cellular respiration	19_GO:0008152 metabolic process	-1.6	-0.15	ANM1
GO:0045619	regulation of lymphocyte differentiation	19_GO:0002376 immune system process	-1.6	-0.14	ANM1
GO:0051896	regulation of protein kinase B signaling	19_GO:0023052 signaling	-1.6	-0.11	ANM1
GO:0006518	peptide metabolic process	19_GO:0008152 metabolic process	-1.6	-0.11	ANM1
GO:0045787	positive regulation of cell cycle	19_GO:0048518 positive regulation of biological process	-1.6	-0.11	ANM1
GO:0043123	positive regulation of I-kappaB kinase/NF-kappaB signaling	19_GO:0023052 signaling	-1.6	-0.11	ANM1
GO:0044242	cellular lipid catabolic process	19_GO:0008152 metabolic process	-1.6	-0.11	ANM1
GO:0051301	cell division	19_GO:0009987 cellular process	-1.6	-0.11	ANM1
GO:0044089	positive regulation of cellular component biogenesis	19_GO:0048518 positive regulation of biological process	-1.6	-0.11	ANM1
GO:0010952	positive regulation of peptidase activity	19_GO:0048518 positive regulation of biological process	-1.5	-0.097	ANM1
GO:0006302	double-strand break repair	19_GO:0050896 response to stimulus	-1.5	-0.094	ANM1
GO:0043393	regulation of protein binding	19_GO:0065007 biological regulation	-1.5	-0.086	ANM1
GO:0001933	negative regulation of protein phosphorylation	19_GO:0048519 negative regulation of biological process	-1.5	-0.086	ANM1
GO:0009615	response to virus	19_GO:0044419 biological process involved in interspecies interaction between organisms	-1.5	-0.083	ANM1
GO:0002520	immune system development	19_GO:0002376 immune system process	-1.5	-0.083	ANM1
GO:0010564	regulation of cell cycle process	19_GO:0050789 regulation of biological process	-1.5	-0.075	ANM1
GO:0002697	regulation of immune effector process	19_GO:0002376 immune system process	-1.5	-0.055	ANM1
GO:1904062	regulation of cation transmembrane transport	19_GO:0051179 localization	-1.5	-0.055	ANM1
GO:0022618	ribonucleoprotein complex assembly	19_GO:0009987 cellular process	-1.5	-0.05	ANM1
GO:0002521	leukocyte differentiation	19_GO:0002376 immune system process	-1.5	-0.05	ANM1
GO:0048871	multicellular organismal homeostasis	19_GO:0032501 multicellular organismal process	-1.4	-0.04	ANM1
GO:0006974	cellular response to DNA damage stimulus	19_GO:0050896 response to stimulus	-1.4	-0.038	ANM1
GO:0060627	regulation of vesicle-mediated transport	19_GO:0051179 localization	-1.4	-0.036	ANM1
GO:0090150	establishment of protein localization to membrane	19_GO:0051179 localization	-1.4	-0.034	ANM1
GO:0071826	ribonucleoprotein complex subunit organization	19_GO:0009987 cellular process	-1.4	-0.031	ANM1
GO:0034764	positive regulation of transmembrane transport	19_GO:0051179 localization	-1.4	-0.031	ANM1
GO:0019932	second-messenger-mediated signaling	19_GO:0023052 signaling	-1.4	-0.028	ANM1
GO:0042063	gliogenesis	19_GO:0032502 developmental process	-1.4	-0.028	ANM1
GO:2001233	regulation of apoptotic signaling pathway	19_GO:0023052 signaling	-1.4	-0.028	ANM1
GO:0032446	protein modification by small protein conjugation	19_GO:0008152 metabolic process	-1.4	-0.027	ANM1
GO:0045862	positive regulation of proteolysis	19_GO:0048518 positive regulation of biological process	-1.4	-0.027	ANM1
GO:0032940	secretion by cell	19_GO:0051179 localization	-1.4	-0.022	ANM1
GO:0006913	nucleocytoplasmic transport	19_GO:0051179 localization	-1.4	-0.018	ANM1
GO:0051169	nuclear transport	19_GO:0051179 localization	-1.4	-0.018	ANM1
GO:0030855	epithelial cell differentiation	19_GO:0032502 developmental process	-1.4	-0.011	ANM1
GO:0006887	exocytosis	19_GO:0051179 localization	-1.4	-0.0074	ANM1
GO:0033157	regulation of intracellular protein transport	19_GO:0051179 localization	-1.4	-0.0043	ANM1
GO:0042326	negative regulation of phosphorylation	19_GO:0048519 negative regulation of biological process	-1.4	0	ANM1
GO:0050778	positive regulation of immune response	19_GO:0002376 immune system process	-1.4	0	ANM1
GO:0051054	positive regulation of DNA metabolic process	19_GO:0048518 positive regulation of biological process	-1.3	0	ANM1
GO:0030099	myeloid cell differentiation	19_GO:0002376 immune system process	-1.3	0	ANM1
GO:0050900	leukocyte migration	19_GO:0040011 locomotion	-1.3	0	ANM1
GO:0001894	tissue homeostasis	19_GO:0032501 multicellular organismal process	-1.3	0	ANM1
GO:0030155	regulation of cell adhesion	19_GO:0022610 biological adhesion	-1.3	0	ANM1
GO:0002703	regulation of leukocyte mediated immunity	19_GO:0002376 immune system process	-1.3	0	ANM1
GO:0045087	innate immune response	19_GO:0044419 biological process involved in interspecies interaction between organisms	-1.3	0	ANM1
GO:0032984	protein-containing complex disassembly	19_GO:0009987 cellular process	-4.7	-1.7	ANM2
GO:0010256	endomembrane system organization	19_GO:0009987 cellular process	-4.6	-1.7	ANM2
GO:0006886	intracellular protein transport	19_GO:0051179 localization	-4.6	-1.7	ANM2
GO:0009895	negative regulation of catabolic process	19_GO:0048519 negative regulation of biological process	-4.4	-1.4	ANM2
GO:0046761	viral budding from plasma membrane	19_GO:0016032 viral process	-4.2	-1.3	ANM2
GO:0046753	non-lytic viral release	19_GO:0016032 viral process	-4.1	-1.3	ANM2
GO:0097352	autophagosome maturation	19_GO:0008152 metabolic process	-3.8	-1.1	ANM2
GO:0030330	DNA damage response, signal transduction by p53 class mediator	19_GO:0023052 signaling	-3.8	-1.1	ANM2
GO:0061952	midbody abscission	19_GO:0009987 cellular process	-3.8	-1.1	ANM2
GO:1902774	late endosome to lysosome transport	19_GO:0051179 localization	-3.8	-1.1	ANM2
GO:0007032	endosome organization	19_GO:0009987 cellular process	-3.8	-1.1	ANM2
GO:0019941	modification-dependent protein catabolic process	19_GO:0008152 metabolic process	-3.8	-1.1	ANM2
GO:0006974	cellular response to DNA damage stimulus	19_GO:0050896 response to stimulus	-3.7	-1.1	ANM2
GO:0043632	modification-dependent macromolecule catabolic process	19_GO:0008152 metabolic process	-3.7	-1.1	ANM2
GO:0042770	signal transduction in response to DNA damage	19_GO:0023052 signaling	-3.7	-1.1	ANM2
GO:0051052	regulation of DNA metabolic process	19_GO:0008152 metabolic process	-3.6	-1	ANM2
GO:1902410	mitotic cytokinetic process	19_GO:0009987 cellular process	-3.5	-0.99	ANM2
GO:0039702	viral budding via host ESCRT complex	19_GO:0016032 viral process	-3.5	-0.99	ANM2
GO:1901673	regulation of mitotic spindle assembly	19_GO:0050789 regulation of biological process	-3.4	-0.99	ANM2
GO:0032210	regulation of telomere maintenance via telomerase	19_GO:0008152 metabolic process	-3.4	-0.99	ANM2
GO:0031468	nuclear membrane reassembly	19_GO:0009987 cellular process	-3.4	-0.96	ANM2
GO:0001778	plasma membrane repair	19_GO:0050896 response to stimulus	-3.3	-0.93	ANM2
GO:0009314	response to radiation	19_GO:0050896 response to stimulus	-3.3	-0.93	ANM2
GO:0030163	protein catabolic process	19_GO:0008152 metabolic process	-3.3	-0.91	ANM2
GO:0046755	viral budding	19_GO:0016032 viral process	-3.3	-0.91	ANM2
GO:0051603	proteolysis involved in cellular protein catabolic process	19_GO:0008152 metabolic process	-3.3	-0.9	ANM2
GO:0006511	ubiquitin-dependent protein catabolic process	19_GO:0008152 metabolic process	-3.2	-0.89	ANM2
GO:0045324	late endosome to vacuole transport	19_GO:0051179 localization	-3.2	-0.89	ANM2
GO:1904356	regulation of telomere maintenance via telomere lengthening	19_GO:0008152 metabolic process	-3.2	-0.88	ANM2
GO:0051054	positive regulation of DNA metabolic process	19_GO:0048518 positive regulation of biological process	-3.1	-0.87	ANM2
GO:0019076	viral release from host cell	19_GO:0016032 viral process	-3.1	-0.87	ANM2
GO:0035891	exit from host cell	19_GO:0044419 biological process involved in interspecies interaction between organisms	-3.1	-0.87	ANM2
GO:0035890	exit from host	19_GO:0044419 biological process involved in interspecies interaction between organisms	-3.1	-0.87	ANM2
GO:0090169	regulation of spindle assembly	19_GO:0050789 regulation of biological process	-3.1	-0.87	ANM2
GO:0031571	mitotic G1 DNA damage checkpoint signaling	19_GO:0023052 signaling	-3.1	-0.87	ANM2
GO:0071214	cellular response to abiotic stimulus	19_GO:0050896 response to stimulus	-3.1	-0.87	ANM2
GO:0104004	cellular response to environmental stimulus	19_GO:0050896 response to stimulus	-3.1	-0.87	ANM2
GO:0044257	cellular protein catabolic process	19_GO:0008152 metabolic process	-3.1	-0.86	ANM2
GO:0036258	multivesicular body assembly	19_GO:0009987 cellular process	-3	-0.84	ANM2
GO:0044819	mitotic G1/S transition checkpoint signaling	19_GO:0023052 signaling	-3	-0.84	ANM2
GO:0036257	multivesicular body organization	19_GO:0009987 cellular process	-3	-0.82	ANM2
GO:0042176	regulation of protein catabolic process	19_GO:0008152 metabolic process	-3	-0.82	ANM2
GO:1903320	regulation of protein modification by small protein conjugation or removal	19_GO:0008152 metabolic process	-3	-0.82	ANM2
GO:0031398	positive regulation of protein ubiquitination	19_GO:0048518 positive regulation of biological process	-3	-0.82	ANM2
GO:0032509	endosome transport via multivesicular body sorting pathway	19_GO:0051179 localization	-3	-0.82	ANM2
GO:0016567	protein ubiquitination	19_GO:0008152 metabolic process	-2.9	-0.78	ANM2
GO:0043162	ubiquitin-dependent protein catabolic process via the multivesicular body sorting pathway	19_GO:0008152 metabolic process	-2.9	-0.77	ANM2
GO:0019068	virion assembly	19_GO:0016032 viral process	-2.9	-0.77	ANM2
GO:1903047	mitotic cell cycle process	19_GO:0009987 cellular process	-2.8	-0.75	ANM2
GO:0031330	negative regulation of cellular catabolic process	19_GO:0048519 negative regulation of biological process	-2.8	-0.74	ANM2
GO:0060612	adipose tissue development	19_GO:0032502 developmental process	-2.8	-0.74	ANM2
GO:0032506	cytokinetic process	19_GO:0009987 cellular process	-2.8	-0.74	ANM2
GO:0044773	mitotic DNA damage checkpoint signaling	19_GO:0023052 signaling	-2.8	-0.72	ANM2
GO:0032204	regulation of telomere maintenance	19_GO:0008152 metabolic process	-2.8	-0.7	ANM2
GO:0071985	multivesicular body sorting pathway	19_GO:0051179 localization	-2.7	-0.7	ANM2
GO:0031400	negative regulation of protein modification process	19_GO:0048519 negative regulation of biological process	-2.7	-0.69	ANM2
GO:0060236	regulation of mitotic spindle organization	19_GO:0050789 regulation of biological process	-2.7	-0.69	ANM2
GO:0002691	regulation of cellular extravasation	19_GO:0040011 locomotion	-2.7	-0.69	ANM2
GO:0044774	mitotic DNA integrity checkpoint signaling	19_GO:0023052 signaling	-2.7	-0.69	ANM2
GO:0007009	plasma membrane organization	19_GO:0009987 cellular process	-2.7	-0.68	ANM2
GO:1903322	positive regulation of protein modification by small protein conjugation or removal	19_GO:0048518 positive regulation of biological process	-2.7	-0.68	ANM2
GO:0045727	positive regulation of translation	19_GO:0048518 positive regulation of biological process	-2.7	-0.68	ANM2
GO:0016050	vesicle organization	19_GO:0009987 cellular process	-2.7	-0.68	ANM2
GO:0072331	signal transduction by p53 class mediator	19_GO:0023052 signaling	-2.7	-0.68	ANM2
GO:0007029	endoplasmic reticulum organization	19_GO:0009987 cellular process	-2.7	-0.68	ANM2
GO:0032446	protein modification by small protein conjugation	19_GO:0008152 metabolic process	-2.6	-0.66	ANM2
GO:0071763	nuclear membrane organization	19_GO:0009987 cellular process	-2.6	-0.66	ANM2
GO:0046636	negative regulation of alpha-beta T cell activation	19_GO:0022610 biological adhesion	-2.6	-0.66	ANM2
GO:0009411	response to UV	19_GO:0050896 response to stimulus	-2.6	-0.66	ANM2
GO:0031396	regulation of protein ubiquitination	19_GO:0008152 metabolic process	-2.6	-0.66	ANM2
GO:0022411	cellular component disassembly	19_GO:0009987 cellular process	-2.6	-0.66	ANM2
GO:0090224	regulation of spindle organization	19_GO:0050789 regulation of biological process	-2.6	-0.65	ANM2
GO:0034976	response to endoplasmic reticulum stress	19_GO:0050896 response to stimulus	-2.6	-0.64	ANM2
GO:1903311	regulation of mRNA metabolic process	19_GO:0008152 metabolic process	-2.6	-0.64	ANM2
GO:0043112	receptor metabolic process	19_GO:0008152 metabolic process	-2.5	-0.6	ANM2
GO:0043488	regulation of mRNA stability	19_GO:0048519 negative regulation of biological process	-2.5	-0.6	ANM2
GO:0007034	vacuolar transport	19_GO:0051179 localization	-2.5	-0.6	ANM2
GO:0006892	post-Golgi vesicle-mediated transport	19_GO:0051179 localization	-2.5	-0.59	ANM2
GO:0010824	regulation of centrosome duplication	19_GO:0050789 regulation of biological process	-2.5	-0.59	ANM2
GO:1902807	negative regulation of cell cycle G1/S phase transition	19_GO:0048519 negative regulation of biological process	-2.5	-0.58	ANM2
GO:0007080	mitotic metaphase plate congression	19_GO:0051179 localization	-2.4	-0.56	ANM2
GO:0045744	negative regulation of G protein-coupled receptor signaling pathway	19_GO:0023052 signaling	-2.4	-0.56	ANM2
GO:0045732	positive regulation of protein catabolic process	19_GO:0048518 positive regulation of biological process	-2.4	-0.56	ANM2
GO:0043487	regulation of RNA stability	19_GO:0008152 metabolic process	-2.4	-0.53	ANM2
GO:0000077	DNA damage checkpoint signaling	19_GO:0023052 signaling	-2.4	-0.53	ANM2
GO:0034250	positive regulation of cellular amide metabolic process	19_GO:0048518 positive regulation of biological process	-2.4	-0.53	ANM2
GO:0051301	cell division	19_GO:0009987 cellular process	-2.4	-0.53	ANM2
GO:0046605	regulation of centrosome cycle	19_GO:0050789 regulation of biological process	-2.4	-0.53	ANM2
GO:0000278	mitotic cell cycle	19_GO:0009987 cellular process	-2.3	-0.52	ANM2
GO:0048255	mRNA stabilization	19_GO:0048519 negative regulation of biological process	-2.3	-0.52	ANM2
GO:0010564	regulation of cell cycle process	19_GO:0050789 regulation of biological process	-2.3	-0.51	ANM2
GO:0051099	positive regulation of binding	19_GO:0065007 biological regulation	-2.3	-0.51	ANM2
GO:0080135	regulation of cellular response to stress	19_GO:0050896 response to stimulus	-2.3	-0.5	ANM2
GO:0061013	regulation of mRNA catabolic process	19_GO:0048519 negative regulation of biological process	-2.3	-0.5	ANM2
GO:2001020	regulation of response to DNA damage stimulus	19_GO:0050896 response to stimulus	-2.3	-0.5	ANM2
GO:0009896	positive regulation of catabolic process	19_GO:0048518 positive regulation of biological process	-2.3	-0.5	ANM2
GO:0006954	inflammatory response	19_GO:0050896 response to stimulus	-2.3	-0.5	ANM2
GO:0007249	I-kappaB kinase/NF-kappaB signaling	19_GO:0023052 signaling	-2.3	-0.5	ANM2
GO:0031570	DNA integrity checkpoint signaling	19_GO:0023052 signaling	-2.3	-0.48	ANM2
GO:0006998	nuclear envelope organization	19_GO:0009987 cellular process	-2.2	-0.47	ANM2
GO:0038127	ERBB signaling pathway	19_GO:0023052 signaling	-2.2	-0.47	ANM2
GO:0002181	cytoplasmic translation	19_GO:0008152 metabolic process	-2.2	-0.47	ANM2
GO:0071709	membrane assembly	19_GO:0009987 cellular process	-2.2	-0.46	ANM2
GO:0006900	vesicle budding from membrane	19_GO:0051179 localization	-2.2	-0.46	ANM2
GO:0007093	mitotic cell cycle checkpoint signaling	19_GO:0023052 signaling	-2.2	-0.45	ANM2
GO:0051310	metaphase plate congression	19_GO:0051179 localization	-2.2	-0.45	ANM2
GO:0001933	negative regulation of protein phosphorylation	19_GO:0048519 negative regulation of biological process	-2.2	-0.45	ANM2
GO:0051656	establishment of organelle localization	19_GO:0051179 localization	-2.2	-0.45	ANM2
GO:0051493	regulation of cytoskeleton organization	19_GO:0050789 regulation of biological process	-2.2	-0.44	ANM2
GO:0034248	regulation of cellular amide metabolic process	19_GO:0008152 metabolic process	-2.2	-0.43	ANM2
GO:0050994	regulation of lipid catabolic process	19_GO:0008152 metabolic process	-2.2	-0.43	ANM2
GO:2000278	regulation of DNA biosynthetic process	19_GO:0008152 metabolic process	-2.1	-0.43	ANM2
GO:1902806	regulation of cell cycle G1/S phase transition	19_GO:0050789 regulation of biological process	-2.1	-0.43	ANM2
GO:0044091	membrane biogenesis	19_GO:0009987 cellular process	-2.1	-0.42	ANM2
GO:0043489	RNA stabilization	19_GO:0048519 negative regulation of biological process	-2.1	-0.42	ANM2
GO:0007041	lysosomal transport	19_GO:0051179 localization	-2.1	-0.42	ANM2
GO:0045936	negative regulation of phosphate metabolic process	19_GO:0048519 negative regulation of biological process	-2.1	-0.42	ANM2
GO:0032535	regulation of cellular component size	19_GO:0065007 biological regulation	-2.1	-0.42	ANM2
GO:0006338	chromatin remodeling	19_GO:0009987 cellular process	-2.1	-0.42	ANM2
GO:0010563	negative regulation of phosphorus metabolic process	19_GO:0048519 negative regulation of biological process	-2.1	-0.42	ANM2
GO:0071901	negative regulation of protein serine/threonine kinase activity	19_GO:0048519 negative regulation of biological process	-2.1	-0.41	ANM2
GO:1902373	negative regulation of mRNA catabolic process	19_GO:0048519 negative regulation of biological process	-2.1	-0.41	ANM2
GO:0051053	negative regulation of DNA metabolic process	19_GO:0048519 negative regulation of biological process	-2.1	-0.41	ANM2
GO:1902532	negative regulation of intracellular signal transduction	19_GO:0023052 signaling	-2.1	-0.4	ANM2
GO:0006333	chromatin assembly or disassembly	19_GO:0009987 cellular process	-2.1	-0.4	ANM2
GO:0000281	mitotic cytokinesis	19_GO:0009987 cellular process	-2.1	-0.39	ANM2
GO:0051098	regulation of binding	19_GO:0065007 biological regulation	-2	-0.38	ANM2
GO:0045786	negative regulation of cell cycle	19_GO:0048519 negative regulation of biological process	-2	-0.38	ANM2
GO:0048193	Golgi vesicle transport	19_GO:0051179 localization	-2	-0.38	ANM2
GO:2001022	positive regulation of response to DNA damage stimulus	19_GO:0048518 positive regulation of biological process	-2	-0.38	ANM2
GO:1902115	regulation of organelle assembly	19_GO:0050789 regulation of biological process	-2	-0.38	ANM2
GO:0070925	organelle assembly	19_GO:0009987 cellular process	-2	-0.38	ANM2
GO:0007059	chromosome segregation	19_GO:0009987 cellular process	-2	-0.37	ANM2
GO:0006417	regulation of translation	19_GO:0008152 metabolic process	-2	-0.37	ANM2
GO:0071900	regulation of protein serine/threonine kinase activity	19_GO:0008152 metabolic process	-2	-0.37	ANM2
GO:0033365	protein localization to organelle	19_GO:0051179 localization	-2	-0.37	ANM2
GO:0071260	cellular response to mechanical stimulus	19_GO:0050896 response to stimulus	-2	-0.37	ANM2
GO:0045911	positive regulation of DNA recombination	19_GO:0048518 positive regulation of biological process	-2	-0.37	ANM2
GO:0051865	protein autoubiquitination	19_GO:0008152 metabolic process	-2	-0.37	ANM2
GO:0052126	movement in host environment	19_GO:0044419 biological process involved in interspecies interaction between organisms	-2	-0.36	ANM2
GO:0050807	regulation of synapse organization	19_GO:0050789 regulation of biological process	-2	-0.35	ANM2
GO:0051640	organelle localization	19_GO:0051179 localization	-2	-0.35	ANM2
GO:0006325	chromatin organization	19_GO:0009987 cellular process	-2	-0.34	ANM2
GO:0042326	negative regulation of phosphorylation	19_GO:0048519 negative regulation of biological process	-1.9	-0.33	ANM2
GO:0050803	regulation of synapse structure or activity	19_GO:0065007 biological regulation	-1.9	-0.33	ANM2
GO:0033044	regulation of chromosome organization	19_GO:0050789 regulation of biological process	-1.9	-0.33	ANM2
GO:0006469	negative regulation of protein kinase activity	19_GO:0048519 negative regulation of biological process	-1.9	-0.33	ANM2
GO:0070972	protein localization to endoplasmic reticulum	19_GO:0051179 localization	-1.9	-0.32	ANM2
GO:0050848	regulation of calcium-mediated signaling	19_GO:0023052 signaling	-1.9	-0.32	ANM2
GO:0051303	establishment of chromosome localization	19_GO:0051179 localization	-1.9	-0.32	ANM2
GO:0016197	endosomal transport	19_GO:0051179 localization	-1.9	-0.32	ANM2
GO:0002520	immune system development	19_GO:0002376 immune system process	-1.9	-0.32	ANM2
GO:1902369	negative regulation of RNA catabolic process	19_GO:0048519 negative regulation of biological process	-1.9	-0.32	ANM2
GO:0010212	response to ionizing radiation	19_GO:0050896 response to stimulus	-1.9	-0.32	ANM2
GO:0010638	positive regulation of organelle organization	19_GO:0048518 positive regulation of biological process	-1.9	-0.31	ANM2
GO:0002685	regulation of leukocyte migration	19_GO:0040011 locomotion	-1.9	-0.31	ANM2
GO:0050000	chromosome localization	19_GO:0051179 localization	-1.9	-0.31	ANM2
GO:0009416	response to light stimulus	19_GO:0050896 response to stimulus	-1.9	-0.3	ANM2
GO:0050890	cognition	19_GO:0032501 multicellular organismal process	-1.9	-0.29	ANM2
GO:0000075	cell cycle checkpoint signaling	19_GO:0023052 signaling	-1.9	-0.29	ANM2
GO:0007030	Golgi organization	19_GO:0009987 cellular process	-1.8	-0.28	ANM2
GO:0006468	protein phosphorylation	19_GO:0008152 metabolic process	-1.8	-0.28	ANM2
GO:0051701	biological process involved in interaction with host	19_GO:0044419 biological process involved in interspecies interaction between organisms	-1.8	-0.28	ANM2
GO:0030433	ubiquitin-dependent ERAD pathway	19_GO:0050896 response to stimulus	-1.8	-0.27	ANM2
GO:0046434	organophosphate catabolic process	19_GO:0008152 metabolic process	-1.8	-0.25	ANM2
GO:0032092	positive regulation of protein binding	19_GO:0065007 biological regulation	-1.8	-0.25	ANM2
GO:1901988	negative regulation of cell cycle phase transition	19_GO:0048519 negative regulation of biological process	-1.8	-0.25	ANM2
GO:0070507	regulation of microtubule cytoskeleton organization	19_GO:0050789 regulation of biological process	-1.8	-0.25	ANM2
GO:0010921	regulation of phosphatase activity	19_GO:0008152 metabolic process	-1.8	-0.24	ANM2
GO:1901987	regulation of cell cycle phase transition	19_GO:0050789 regulation of biological process	-1.8	-0.23	ANM2
GO:2000134	negative regulation of G1/S transition of mitotic cell cycle	19_GO:0048519 negative regulation of biological process	-1.8	-0.23	ANM2
GO:0033673	negative regulation of kinase activity	19_GO:0048519 negative regulation of biological process	-1.8	-0.22	ANM2
GO:0008064	regulation of actin polymerization or depolymerization	19_GO:0050789 regulation of biological process	-1.7	-0.21	ANM2
GO:0006400	tRNA modification	19_GO:0008152 metabolic process	-1.7	-0.21	ANM2
GO:0034644	cellular response to UV	19_GO:0050896 response to stimulus	-1.7	-0.21	ANM2
GO:0030832	regulation of actin filament length	19_GO:0050789 regulation of biological process	-1.7	-0.21	ANM2
GO:2000045	regulation of G1/S transition of mitotic cell cycle	19_GO:0050789 regulation of biological process	-1.7	-0.2	ANM2
GO:0051250	negative regulation of lymphocyte activation	19_GO:0002376 immune system process	-1.7	-0.2	ANM2
GO:0006605	protein targeting	19_GO:0051179 localization	-1.7	-0.19	ANM2
GO:0044772	mitotic cell cycle phase transition	19_GO:0009987 cellular process	-1.7	-0.19	ANM2
GO:1903312	negative regulation of mRNA metabolic process	19_GO:0048519 negative regulation of biological process	-1.7	-0.18	ANM2
GO:0016032	viral process	19_GO:0016032 viral process	-1.7	-0.18	ANM2
GO:0016236	macroautophagy	19_GO:0008152 metabolic process	-1.7	-0.17	ANM2
GO:0140014	mitotic nuclear division	19_GO:0009987 cellular process	-1.7	-0.16	ANM2
GO:0002244	hematopoietic progenitor cell differentiation	19_GO:0002376 immune system process	-1.7	-0.16	ANM2
GO:0031331	positive regulation of cellular catabolic process	19_GO:0048518 positive regulation of biological process	-1.6	-0.16	ANM2
GO:0045859	regulation of protein kinase activity	19_GO:0008152 metabolic process	-1.6	-0.16	ANM2
GO:0061640	cytoskeleton-dependent cytokinesis	19_GO:0009987 cellular process	-1.6	-0.16	ANM2
GO:0070663	regulation of leukocyte proliferation	19_GO:0050789 regulation of biological process	-1.6	-0.16	ANM2
GO:1901991	negative regulation of mitotic cell cycle phase transition	19_GO:0048519 negative regulation of biological process	-1.6	-0.16	ANM2
GO:0022613	ribonucleoprotein complex biogenesis	19_GO:0009987 cellular process	-1.6	-0.15	ANM2
GO:0044770	cell cycle phase transition	19_GO:0009987 cellular process	-1.6	-0.15	ANM2
GO:0030155	regulation of cell adhesion	19_GO:0022610 biological adhesion	-1.6	-0.15	ANM2
GO:0000910	cytokinesis	19_GO:0009987 cellular process	-1.6	-0.15	ANM2
GO:0036503	ERAD pathway	19_GO:0050896 response to stimulus	-1.6	-0.15	ANM2
GO:0050764	regulation of phagocytosis	19_GO:0051179 localization	-1.6	-0.13	ANM2
GO:0071478	cellular response to radiation	19_GO:0050896 response to stimulus	-1.6	-0.12	ANM2
GO:0006664	glycolipid metabolic process	19_GO:0008152 metabolic process	-1.6	-0.12	ANM2
GO:0050778	positive regulation of immune response	19_GO:0002376 immune system process	-1.6	-0.11	ANM2
GO:1902106	negative regulation of leukocyte differentiation	19_GO:0002376 immune system process	-1.6	-0.11	ANM2
GO:1903509	liposaccharide metabolic process	19_GO:0008152 metabolic process	-1.6	-0.11	ANM2
GO:0062014	negative regulation of small molecule metabolic process	19_GO:0048519 negative regulation of biological process	-1.6	-0.11	ANM2
GO:0019058	viral life cycle	19_GO:0016032 viral process	-1.6	-0.11	ANM2
GO:0043409	negative regulation of MAPK cascade	19_GO:0023052 signaling	-1.6	-0.11	ANM2
GO:0001818	negative regulation of cytokine production	19_GO:0048519 negative regulation of biological process	-1.5	-0.095	ANM2
GO:0051348	negative regulation of transferase activity	19_GO:0065007 biological regulation	-1.5	-0.093	ANM2
GO:0045833	negative regulation of lipid metabolic process	19_GO:0048519 negative regulation of biological process	-1.5	-0.093	ANM2
GO:0046634	regulation of alpha-beta T cell activation	19_GO:0002376 immune system process	-1.5	-0.093	ANM2
GO:1903707	negative regulation of hemopoiesis	19_GO:0002376 immune system process	-1.5	-0.086	ANM2
GO:0051129	negative regulation of cellular component organization	19_GO:0048519 negative regulation of biological process	-1.5	-0.078	ANM2
GO:0045596	negative regulation of cell differentiation	19_GO:0032502 developmental process	-1.5	-0.075	ANM2
GO:0021761	limbic system development	19_GO:0032502 developmental process	-1.5	-0.075	ANM2
GO:0006914	autophagy	19_GO:0008152 metabolic process	-1.5	-0.069	ANM2
GO:0061919	process utilizing autophagic mechanism	19_GO:0009987 cellular process	-1.5	-0.069	ANM2
GO:0032200	telomere organization	19_GO:0009987 cellular process	-1.5	-0.061	ANM2
GO:0010948	negative regulation of cell cycle process	19_GO:0048519 negative regulation of biological process	-1.5	-0.061	ANM2
GO:0043433	negative regulation of DNA-binding transcription factor activity	19_GO:0008152 metabolic process	-1.5	-0.06	ANM2
GO:0002698	negative regulation of immune effector process	19_GO:0002376 immune system process	-1.5	-0.048	ANM2
GO:0002695	negative regulation of leukocyte activation	19_GO:0002376 immune system process	-1.5	-0.045	ANM2
GO:0071482	cellular response to light stimulus	19_GO:0050896 response to stimulus	-1.4	-0.041	ANM2
GO:0034470	ncRNA processing	19_GO:0008152 metabolic process	-1.4	-0.034	ANM2
GO:0090066	regulation of anatomical structure size	19_GO:0065007 biological regulation	-1.4	-0.034	ANM2
GO:0030097	hemopoiesis	19_GO:0002376 immune system process	-1.4	-0.034	ANM2
GO:0043393	regulation of protein binding	19_GO:0065007 biological regulation	-1.4	-0.034	ANM2
GO:0090288	negative regulation of cellular response to growth factor stimulus	19_GO:0048519 negative regulation of biological process	-1.4	-0.031	ANM2
GO:0098876	vesicle-mediated transport to the plasma membrane	19_GO:0051179 localization	-1.4	-0.027	ANM2
GO:0034614	cellular response to reactive oxygen species	19_GO:0050896 response to stimulus	-1.4	-0.027	ANM2
GO:0032649	regulation of interferon-gamma production	19_GO:0032501 multicellular organismal process	-1.4	-0.027	ANM2
GO:0000070	mitotic sister chromatid segregation	19_GO:0009987 cellular process	-1.4	-0.027	ANM2
GO:0044089	positive regulation of cellular component biogenesis	19_GO:0048518 positive regulation of biological process	-1.4	-0.027	ANM2
GO:0007167	enzyme linked receptor protein signaling pathway	19_GO:0023052 signaling	-1.4	-0.026	ANM2
GO:0050864	regulation of B cell activation	19_GO:0002376 immune system process	-1.4	-0.026	ANM2
GO:1903131	mononuclear cell differentiation	19_GO:0002376 immune system process	-1.4	-0.026	ANM2
GO:0006650	glycerophospholipid metabolic process	19_GO:0008152 metabolic process	-1.4	-0.026	ANM2
GO:0030029	actin filament-based process	19_GO:0009987 cellular process	-1.4	-0.026	ANM2
GO:0042254	ribosome biogenesis	19_GO:0009987 cellular process	-1.4	-0.022	ANM2
GO:0032271	regulation of protein polymerization	19_GO:0050789 regulation of biological process	-1.4	-0.022	ANM2
GO:0006643	membrane lipid metabolic process	19_GO:0008152 metabolic process	-1.4	-0.018	ANM2
GO:0016071	mRNA metabolic process	19_GO:0008152 metabolic process	-1.4	-0.018	ANM2
GO:0001568	blood vessel development	19_GO:0032502 developmental process	-1.4	-0.0043	ANM2
GO:0043254	regulation of protein-containing complex assembly	19_GO:0050789 regulation of biological process	-1.4	0	ANM2
GO:0043161	proteasome-mediated ubiquitin-dependent protein catabolic process	19_GO:0008152 metabolic process	-1.4	0	ANM2
GO:0007169	transmembrane receptor protein tyrosine kinase signaling pathway	19_GO:0023052 signaling	-1.4	0	ANM2
GO:0051224	negative regulation of protein transport	19_GO:0051179 localization	-1.3	0	ANM2
GO:0042177	negative regulation of protein catabolic process	19_GO:0048519 negative regulation of biological process	-1.3	0	ANM2
GO:0002688	regulation of leukocyte chemotaxis	19_GO:0040011 locomotion	-1.3	0	ANM2
GO:0008033	tRNA processing	19_GO:0008152 metabolic process	-1.3	0	ANM2
GO:0050868	negative regulation of T cell activation	19_GO:0022610 biological adhesion	-1.3	0	ANM2
GO:0007162	negative regulation of cell adhesion	19_GO:0022610 biological adhesion	-1.3	0	ANM2
GO:0090150	establishment of protein localization to membrane	19_GO:0051179 localization	-1.3	0	ANM2
GO:0010035	response to inorganic substance	19_GO:0050896 response to stimulus	-1.3	0	ANM2
GO:0051668	localization within membrane	19_GO:0051179 localization	-1.3	0	ANM2
GO:0016311	dephosphorylation	19_GO:0008152 metabolic process	-1.3	0	ANM2
GO:1904950	negative regulation of establishment of protein localization	19_GO:0051179 localization	-1.3	0	ANM2
GO:0045055	regulated exocytosis	19_GO:0051179 localization	-1.3	0	ANM2
GO:0050866	negative regulation of cell activation	19_GO:0048519 negative regulation of biological process	-1.3	0	ANM2
GO:0006886	intracellular protein transport	19_GO:0051179 localization	-3.8	-1.1	ZIB
GO:0002250	adaptive immune response	19_GO:0002376 immune system process	-3.2	-0.88	ZIB
GO:0006897	endocytosis	19_GO:0051179 localization	-3	-0.82	ZIB
GO:0001960	negative regulation of cytokine-mediated signaling pathway	19_GO:0023052 signaling	-2.9	-0.8	ZIB
GO:0060761	negative regulation of response to cytokine stimulus	19_GO:0048519 negative regulation of biological process	-2.9	-0.75	ZIB
GO:0009617	response to bacterium	19_GO:0044419 biological process involved in interspecies interaction between organisms	-2.8	-0.7	ZIB
GO:0000041	transition metal ion transport	19_GO:0051179 localization	-2.7	-0.7	ZIB
GO:0030001	metal ion transport	19_GO:0051179 localization	-2.5	-0.58	ZIB
GO:0048511	rhythmic process	19_GO:0048511 rhythmic process	-2.4	-0.56	ZIB
GO:0032870	cellular response to hormone stimulus	19_GO:0050896 response to stimulus	-2.3	-0.49	ZIB
GO:0006898	receptor-mediated endocytosis	19_GO:0051179 localization	-2.2	-0.46	ZIB
GO:0001959	regulation of cytokine-mediated signaling pathway	19_GO:0023052 signaling	-2.1	-0.42	ZIB
GO:0010035	response to inorganic substance	19_GO:0050896 response to stimulus	-2.1	-0.42	ZIB
GO:0007565	female pregnancy	19_GO:0022414 reproductive process	-2.1	-0.41	ZIB
GO:0000302	response to reactive oxygen species	19_GO:0050896 response to stimulus	-2.1	-0.41	ZIB
GO:0060759	regulation of response to cytokine stimulus	19_GO:0050896 response to stimulus	-2.1	-0.38	ZIB
GO:0002366	leukocyte activation involved in immune response	19_GO:0002376 immune system process	-2.1	-0.38	ZIB
GO:0098657	import into cell	19_GO:0051179 localization	-2	-0.38	ZIB
GO:0002263	cell activation involved in immune response	19_GO:0002376 immune system process	-2	-0.38	ZIB
GO:0042742	defense response to bacterium	19_GO:0044419 biological process involved in interspecies interaction between organisms	-2	-0.38	ZIB
GO:0045087	innate immune response	19_GO:0044419 biological process involved in interspecies interaction between organisms	-2	-0.37	ZIB
GO:0002831	regulation of response to biotic stimulus	19_GO:0050896 response to stimulus	-2	-0.37	ZIB
GO:0046486	glycerolipid metabolic process	19_GO:0008152 metabolic process	-2	-0.36	ZIB
GO:0002695	negative regulation of leukocyte activation	19_GO:0002376 immune system process	-2	-0.34	ZIB
GO:0001818	negative regulation of cytokine production	19_GO:0048519 negative regulation of biological process	-2	-0.34	ZIB
GO:0044706	multi-multicellular organism process	19_GO:0032501 multicellular organismal process	-1.9	-0.33	ZIB
GO:0090150	establishment of protein localization to membrane	19_GO:0051179 localization	-1.9	-0.29	ZIB
GO:0010942	positive regulation of cell death	19_GO:0048518 positive regulation of biological process	-1.8	-0.28	ZIB
GO:0016197	endosomal transport	19_GO:0051179 localization	-1.8	-0.27	ZIB
GO:0050866	negative regulation of cell activation	19_GO:0048519 negative regulation of biological process	-1.8	-0.27	ZIB
GO:0009410	response to xenobiotic stimulus	19_GO:0050896 response to stimulus	-1.8	-0.26	ZIB
GO:0045017	glycerolipid biosynthetic process	19_GO:0008152 metabolic process	-1.8	-0.24	ZIB
GO:0002694	regulation of leukocyte activation	19_GO:0002376 immune system process	-1.8	-0.23	ZIB
GO:0009636	response to toxic substance	19_GO:0050896 response to stimulus	-1.8	-0.23	ZIB
GO:0001775	cell activation	19_GO:0009987 cellular process	-1.7	-0.22	ZIB
GO:0002683	negative regulation of immune system process	19_GO:0002376 immune system process	-1.7	-0.21	ZIB
GO:0002460	adaptive immune response based on somatic recombination of immune receptors built from immunoglobulin superfamily domains	19_GO:0002376 immune system process	-1.7	-0.21	ZIB
GO:0002252	immune effector process	19_GO:0002376 immune system process	-1.7	-0.2	ZIB
GO:0033365	protein localization to organelle	19_GO:0051179 localization	-1.7	-0.18	ZIB
GO:0072657	protein localization to membrane	19_GO:0051179 localization	-1.7	-0.17	ZIB
GO:0042110	T cell activation	19_GO:0002376 immune system process	-1.6	-0.16	ZIB
GO:0050865	regulation of cell activation	19_GO:0050789 regulation of biological process	-1.6	-0.16	ZIB
GO:0022407	regulation of cell-cell adhesion	19_GO:0022610 biological adhesion	-1.6	-0.16	ZIB
GO:0048545	response to steroid hormone	19_GO:0050896 response to stimulus	-1.6	-0.11	ZIB
GO:0090407	organophosphate biosynthetic process	19_GO:0008152 metabolic process	-1.5	-0.094	ZIB
GO:0009725	response to hormone	19_GO:0050896 response to stimulus	-1.5	-0.072	ZIB
GO:0045321	leukocyte activation	19_GO:0002376 immune system process	-1.5	-0.049	ZIB
GO:0051668	localization within membrane	19_GO:0051179 localization	-1.5	-0.049	ZIB
GO:0061024	membrane organization	19_GO:0009987 cellular process	-1.4	-0.031	ZIB
GO:0043065	positive regulation of apoptotic process	19_GO:0048518 positive regulation of biological process	-1.4	-0.03	ZIB
GO:0051249	regulation of lymphocyte activation	19_GO:0002376 immune system process	-1.4	-0.028	ZIB
GO:1901137	carbohydrate derivative biosynthetic process	19_GO:0008152 metabolic process	-1.4	-0.028	ZIB
GO:0043068	positive regulation of programmed cell death	19_GO:0048518 positive regulation of biological process	-1.4	-0.017	ZIB
GO:0072594	establishment of protein localization to organelle	19_GO:0051179 localization	-1.4	-0.017	ZIB
GO:0034097	response to cytokine	19_GO:0050896 response to stimulus	-1.4	-0.0074	ZIB
GO:0006631	fatty acid metabolic process	19_GO:0008152 metabolic process	-1.4	-0.0025	ZIB
GO:0006790	sulfur compound metabolic process	19_GO:0008152 metabolic process	-1.3	0	ZIB
GO:0072521	purine-containing compound metabolic process	19_GO:0008152 metabolic process	-1.3	0	ZIB
GO:0098662	inorganic cation transmembrane transport	19_GO:0051179 localization	-1.3	0	ZIB
GO:0050863	regulation of T cell activation	19_GO:0002376 immune system process	-1.3	0	ZIB
GO:1903037	regulation of leukocyte cell-cell adhesion	19_GO:0022610 biological adhesion	-1.3	0	ZIB
